# The Molecular Mass and Isoelectric Point of Plant Proteomes

Tapan Kumar Mohanta<sup>\*1</sup>, Abdullatif Khan<sup>1</sup>, Abeer Hashem<sup>2</sup>, Elsayed Fathi Abd\_Allah<sup>3</sup>, Ahmed Al-Harrasi<sup>1</sup>

<sup>1</sup>Natural and Medical Science Research Centre, University of Nizwa, 616, Oman

<sup>2</sup>Botany and Microbiology Department, King Saud University, Riyadh, 11451, Saudi Arabia

<sup>3</sup>Plant Production Department, King Saud University, Riyadh, 11451, Saudi Arabia

Corresponding author: Tapan Kumar Mohanta, E-mail: nostoc.tapan@gmail.com

## Abstract

A proteomic analysis of proteomes from 145 plant species revealed a *pI* range of 1.99 (epsin) to 13.96 (hypothetical protein). The molecular mass of the plant proteins ranged from 0.54 to 2236.8 kDa. A putative Type-I polyketide synthase (22244 amino acids) in *Volvox carteri* was found to be the largest protein in the plant kingdom and was not found in higher plant species. Titin (806.46 kDa) and misin/midasin (730.02 kDa) were the largest proteins identified in higher plant species. The *pI* and molecular weight of the plant proteome exhibited a trimodal distribution. An acidic *pI* (56.44% of proteins) was found to be predominant over a basic *pI* (43.34% of proteins) and the abundance of acidic *pI* proteins was higher in unicellular algae species relative to multicellular higher plants. In contrast, the seaweed, *Porphyra umbilicalis*, possesses a higher proportion of basic *pI* proteins (70.09%). Plant proteomes were also found to contain the amino acid, selenocysteine (Sec), which is the first report of the presence of this amino acid in plants. Additionally, plant proteomes also possess ambiguous amino acids Xaa (unknown), Asx (asparagine or aspartic acid), Glx (glutamine or glutamic acid), and Xle (leucine or isoleucine) as well.

**Key words:** Proteome, amino acids, Isoelectric point, Molecular weight, Selenocysteine, Pyrrolysine

## Introduction

The isoelectric or isoionic point of a protein is the pH at which a protein carries no net electrical charge and hence is considered neutral<sup>1-4</sup>. The zwitterion form of a protein becomes dominant at neutral pH. The *pI* of polypeptides is largely dependent on the dissociation constant of the ionisable groups<sup>5</sup>. The major ionisable groups present in the amino acids are arginine, aspartate, cysteine, histidine, glutamate, lysine, and glutamine, where they play a major role in determining the *pI* of a protein<sup>6-8</sup>. Co-translational and post-translational modifications of a protein, however, can also play a significant role in determining the *pI* of a protein<sup>9,10</sup>. The exposure of charged residues to the solvents, hydrogen bonds (dipole interactions) and dehydration also impact the *pI* of a protein<sup>11,12</sup>. The inherent *pI* of protein, however, is primarily based on its native protein sequence. The *pI* of a protein is crucial to understanding its biochemical function and thus determining *pI* is an essential aspect of proteomic studies. During electrophoresis, the direction of movement of a protein in a gel or other matrix depends on its *pI*, hence numerous proteins can be separated based on their *pI*<sup>13-16</sup>. Given the impact of post-translational modifications and other biochemical alterations (phosphorylation, methylation, alkylation), however, the predicted *pI* of a protein will certainly be different than the predicted *pI*; the latter of which is based on the composition of amino acids in a protein<sup>9,17,18</sup>. Nonetheless, an estimated isoelectric point is highly important and a commonly identified parameter.

Several studies have been conducted to understand the *pI* of proteins/polypeptides<sup>3,19-21</sup>. These studies have been mainly based on animal, bacteria, and virus models and databases containing the *pI* of experimentally verified proteins. None of these databases, however, contain more than ten thousand proteins sequences which is very few relative to the availability of proteomic data. Therefore, an analysis was conducted of the *pI* and molecular weight of proteins from 144 plant

species which included 5.87 million protein sequences. This analysis provides an in-depth analysis of the *pI* and molecular mass of the proteins in the plant kingdom.

## Results and Discussion

### *Plant proteins range from 0.54 kDa to 2236.8 kDa*

A proteome-based analysis of plant proteins of 144 plant species that included more than 5.86 million protein sequences was conducted to determine the molecular mass, *pI*, and amino acid composition of proteins that exist in plant proteomes (Table 1). The analysis indicated that *Hordeum vulgare* possessed the highest number (248180) of protein sequences, while *Helicosporidium* sp. had the lowest number (6033). On average, plant proteomes possess 40988.66 protein sequences per species. The analysis also revealed that the molecular mass of plant proteomes ranged from 0.54 kDa to 2236.8 kDa. *Volvox carteri* was found to possess the largest plant protein (XP\_002951836.1) of 2236.8 kDa, containing 22244 amino acids (*pI* 5.94), while *Citrus unshiu* possessed the smallest protein of 0.54 kDa, containing only four amino acids (*pI* 5.98) (id: GAY42954.1). This is the first analysis to document the largest (2236.8 kDa) and smallest (0.54 kDa) protein in the plant kingdom. These two proteins have not been functionally annotated and BLASTP analysis in the NCBI database did not identify suitable similarity with any other proteins. A few domains present in the largest protein, however, were found to be conserved with Type-I polyketide synthase. The molecular mass of some other high molecular mass proteins were: 2056.44 kDa (id: XP\_001698501.1, type-1 polyketide synthase, *pI*: 6.00, aa: 21004, *Chlamydomonas reinhardtii*); 1994.71 kDa (id: XP\_001416378.1, polyketide synthase, *pI*: 7.38, aa: 18193, *Ostreococcus lucimarinus*); 1932.21 kDa (id: Cz02g22160.t1, unknown protein, *pI*: 5.7, aa: 18533, *Chromochloris zofingiensis*); 1814.1 kDa (id: XP\_007509537.1, unknown protein, *pI*: 4.46, aa: 16310, *Bathycoccus prasinos*); 1649.26 kDa (id: XP\_011401890.1, polyketide synthase, *pI*: 5.53, aa: 16440, *Auxenochlorella protothecoides*); 1632.35 kDa (id: XP\_005650993.1, ketoacyl-synt-

domain-containing protein, *pI*: 5.86, aa: 15797, *Coccomyxa subellipsoidea*); 1532.91 kDa (id: XP\_002507643.1, polyketide synthase, *pI*: 7.07, aa: 14149, *Micromonas commoda*); 1370.23 kDa (id: GAX78753.1, hypothetical protein CEUSTIGMA, *pI*: 5.97, aa: 13200, *Chlamydomonas eustigma*); 1300.83 kDa (id: XP\_022026115.1, unknown protein/filaggrin-like, *pI*: 11.75, aa: 12581, *Helianthus annuus*); 1269.42 kDa (id: XP\_009350379.1, unknown protein, *pI*: 5.37, aa: 11880, *Pyrus bretschneideri*); 1237.34 kDa (id: XP\_022840687.1, polyketide synthase, *pI*: 7.30, aa: 11265, *Ostreococcus tauri*); 1159.35 kDa (id: XP\_005847912.1, polyketide synthase, *pI*: 5.91, aa: 11464, *Chlorella variabilis*); 1150.02 kDa (id: PKI66547.1, unknown protein, *pI*: 3.87, aa: 11234, *Punica granatum*); 1027.64 kDa (id: Sphfalx0133s0012.1, unknown protein, *pI*: 4.05, aa: 9126, *Sphagnum fallax*); 909.93 kDa (id: XP\_002985373.1, unknown/titin-like protein, *pI*: 4.02, aa: 8462, *Selaginella moellendorffii*); 881.59 kDa (id: KXZ46216.1, hypothetical protein, *pI*: 5.80, aa: 8881, *Gonium pectorale*); 848.29 kDa (id: XP\_003056330.1, *pI*: 6.12, aa: 7926, *Micromonas pusilla*); 813.31 kDa (id: GAQ82263.1, unknown protein, *pI*: 4.60, aa: 7617, *Klebsormidium nitens*), 806.46 kDa (id: XP\_017639830.1, titin-like, *pI*: 4.21, aa: 7209, *Gossypium arboreum*); 806.12 kDa (id: OAE35580.1, *pI*: 4.83, hypothetical protein, aa: 7651, *Marchantia polymorpha*); and 802.74 kDa, (id: XP\_012444755.1, titin-like, *pI*: 4.19, aa: 7181, *Gossypium raimondii*) (Table 1).

On average, approximately 7.38 % of the analysed proteins were found to contain  $\geq 100$  kDa proteins. The algal species, *V. carteri*, was found to encode largest plant protein (putative polyketide synthase); while other unicellular algae, and multi-cellular lower eukaryotic plants, including bryophytes and pteridophytes, were also found to encode some of the larger proteins (e.g. ketoacyl synthase) in the plant kingdom. The higher eukaryotic plants, including gymnosperms and angiosperms, were not found to encode a high molecular mass polyketide synthase protein. They did, however, possess the high molecular mass proteins; titin (806.46 kDa), misin/midasin (730.02 kDa), futsch (622.14 kDa), filaggrin (644.4 kDa), auxin transport

protein BIG (568.4 kDa), and von Willebrand factor (624.74 kDa) (Table 1). Titin is an extremely large protein that is greater than 1  $\mu$ M in length and found in human striated muscle<sup>22,23</sup>. The largest titin protein found in plants, however, was only 806.46 kDa (*Gossypium arboreum*). The predicted formula of the 806.46 kDa titin protein was C<sub>33863</sub>H<sub>54610</sub>N<sub>9232</sub>O<sub>13061</sub>S<sub>200</sub> and its estimated half-life was 10-30 hours; whereas the predicted formula of the 2236.8 kDa protein of *V. carteri* was C<sub>97783</sub>H<sub>157401</sub>N<sub>28489</sub>O<sub>30265</sub>S<sub>637</sub>. Almost all of the higher eukaryotic plants were found to possess titin, misin/midasin, and auxin transport protein BIG proteins. Species of unicellular algae were not found to possess titin or misin/midasin proteins. This suggests that titin and misin/midasin proteins originated and evolved in more complex, multicellular organisms rather than unicellular organisms. Thus, the evolution of titin, misin/midasin proteins may also be associated with the evolution of terrestrial plants from aquatic plants.

The presence of the smallest molecular mass protein, other than the tripeptide glutathione (Cys, Gly, and Glu), was also determined. A 0.54 kDa molecular mass protein, containing only four amino acids (MIMF) and starting with methionine and ending with phenylalanine, was identified in *Citrus unshiu* (id: GAY42954.1) (Table 1). Other low molecular mass plant proteins were 0.57 kDa (NP\_001336532.1/ AT5G23115, *Arabidopsis thaliana*) and 0.63 kDa (AH003201-RA, *Amaranthus hypochondriacus*). Small proteins found in *A. thaliana* was MNPKS and that found in *A. hypochondriacus* was MLPYN, contained only five amino acids. These low molecular mass proteins were not present in all of the studied species and their cellular and molecular functions have not been reported yet. One of the universal small molecular weight plant proteins, however, was identified as cytochrome b6/f complex subunit VIII (chloroplast) (MDIVSLAWAALMVVFTFSLSLVWGRSGL) that contains only 29 amino acids. Cytochrome b6/f is actively involved in the electron transfer system of

photosystem II and regulates photosynthesis<sup>24–28</sup>. It is commonly known that glutathione is the smallest functional polypeptide and that it plays diverse roles in cell signaling<sup>29–31</sup>. The tetra and penta peptides identified in the present analysis, however, were quite different from glutathione and none of them contained Cys, Gly, or Glu amino acids, as found in glutathione. Polypeptides with less than 100 amino acids are considered small proteins and studies indicate that many small proteins are involved in cell metabolism, cell signaling, cell growth, and DNA damage<sup>32–35</sup>. In the era of next-generation sequencing, small protein-coding genes are completely overlooked during genome annotation and get buried amongst an enormous number of open reading frames<sup>36</sup>. Therefore, it is difficult to identify more numbers of small proteins in plants.

A previously conducted comparative study revealed that plant proteins are comparatively smaller than animal proteins, as the former are encoded by fewer exons<sup>37</sup>. Longer proteins harbour more conserved domains and hence display a greater number of biological functions than short proteins. The average protein length of the studied plant species was 424.34 amino acids. A previous study reported the average length of eukaryotic proteins to be 472 amino acids and that the average length of plant proteins is approximately 81 amino acids shorter than animal proteins<sup>37</sup>. Our analysis indicates, however, that plant proteins are approximately 47.66 amino acid shorter than animal proteins. In addition, studies have also indicated that eukaryotic proteins are longer than bacterial proteins and that eukaryote genomes contain approximately 7 fold more proteins (48% larger) than bacterial genomes<sup>38</sup>. Although the average size of plant proteins was found to be 424.34 amino acids, the average protein size of lower, eukaryotic unicellular aquatic plant species; including *Chlamydomonas eustigma*, *Volvox carteri*, *Klebsordium nitens*, *Bathycoccus prasinos*, and *Durio zibethinus*, was found to be 576.56, 568.22, 538.73, 521.05, and 504.36 amino acids, respectively. This indicates that

unicellular plant species have an average protein size that is larger than terrestrial multicellular complex plant species, suggesting that the evolution of plant proteins involved a loss of protein size and hence gene size. The cause of the variability in protein length in the phylogenetic lineage of eukaryotic plants has yet to be elucidated. A multitude of evolutionary factors, including deletion (loss of exons) or fusion of multiple domains of proteins, may have played critical roles in shaping the size of higher plant proteins. Transposon insertion and splitting of genes increases the number of proteins but reduces the average size of the proteins<sup>39–42</sup>. Higher plants contain a very large number of transposable elements and therefore these elements are the most responsible factor to expect to have played a major role in increasing protein numbers and reducing the protein size in higher plants. The percentage of transposable elements in a genome is directly proportional to the genome size of the organism and varies from approximately 3% in small genomes to approximately 85% in large genomes<sup>41</sup>. Kirag et al (2007) reported a significant correlation between protein length and the *pI* of a protein<sup>19</sup>. In our analysis, however, no correlation was found between protein length and the *pI* of a protein. For example, titin and misin are two of the larger proteins in plants and they fall in the acidic *pI* range, but not the alkaline *pI* range.

### ***Plant encode a higher number of proteins than animals and fungi***

Our analysis identified an average of 40469.47 proteins per genome (Table 1). Previously the number of proteins in plant species was reported as 36795 per genome<sup>37</sup>. On average, animals and fungi encode 25189 and 9113 proteins per genome, respectively<sup>37</sup>. An average of 40469.47 proteins per plant genome is 62.24% higher than in animals and 444.08% higher than in fungi. Although, plant species encode a higher number of proteins, their size is smaller than the average size of animal proteins. Notably, green algae contains a smaller number of proteins than higher plants but their average protein size is 1.27 times larger. The average protein size (low to high) in the species of green algae ranged from 273.08 (*Helicosporidium* sp.) to 576.56

(*Chlamydomonas eustigma*) amino acids, dicots ranged from 253.34 (*Trifolium pratense*) to 498.49 (*Vitis vinifera*), and monocots ranged from 111.54 (*Hordeum vulgare*) to 473.35 (*Brachypodium distachyon*) amino acids. The average protein size of monocot proteins (431.07 amino acids), however, is slightly larger than dicots (424.3 amino acids). In addition to transposons, previous studies have reported that endosymbiosis may have also played an important role in the reduction of protein size in plant genomes<sup>37,43,44</sup>. This would have been due to the post endosymbiosis acquisition of thousands of genes from the chloroplast, since cyanobacterial proteins are smaller than eukaryotic proteins and cyanobacteria are the ancestors of plastids<sup>37,45</sup>. In this hypothesis, the intermediate size of plant proteins would be the result of the migration of proteins from cyanobacteria (chloroplast) to the plant nucleus, thereby reducing the overall average size of the protein by a dilution effect<sup>46,47</sup>.

### ***The pI of plant proteins ranges from 1.99 to 13.96***

Results indicated that the *pI* of analysed plant proteins ranged from 1.99 (id: PHT45033.1, *Capsicum baccatum*) to 13.96 (id: PKI59361.1, *Punica granatum*). The protein with the lowest *pI* (1.99) was epsin and the protein with the highest *pI* (13.96) was a hypothetical protein. This is the first study to report on the plant proteins with the lowest and highest *pI*. The *C. baccatum* protein with *pI* 1.99 contains 271 amino acids, whereas the *P. granatum* protein with *pI* 13.96 contains 986 amino acids. The epsin protein (*pI* 1.99) is composed of 16 amino acid repeats (GWIDGWIDGWIDGW), while the hypothetical protein (*pI* 13.06) is composed of 64 QKLKSGLT and 31 TRRGLTAV repeats. From among the 20 essential amino acids, the epsin protein only contained five amino acids, namely Asp (68), Gly (68), Ile (65), Met (3), and Trp (67). The amino acids were arranged in a repeating manner within the full-length epsin protein. This study is the first to report a full-length protein composed of such a minimum number of essential amino acids. Similarly, the hypothetical protein with the highest *pI* (13.96) was composed of only nine amino acids, namely Ala (62), Gly (132), Lys (127), Leu (197), Met

(M), Pro (4), Gln (64), Arg (132), and Ser (66). Intriguingly, cysteine, which is one of the most important amino acids as it is responsible for the formation of disulphide bonds, was not found in either the smallest or largest protein. Disulphide bonds maintain the conformation and stability of a protein and are typically found in extracellular proteins and only rarely in intracellular proteins<sup>48</sup>. The absence of Cys amino acids in these proteins suggests that these proteins are localized to the intracellular compartments within the cell.

The plant proteome is primarily composed of acidic *pI* proteins rather than basic *pI* proteins (Table 1). Approximately, 56.44% of the analysed proteins had a *pI* within the acidic *pI* range. The average percentage of acidic *pI* proteins was comparatively higher in the lower eukaryotic plants, algae, and bryophytes, than in the higher land plants. A total of 64.18% of proteins in *Chlamydomonas eustigma* were found in the acidic *pI* region, followed by *Ostreococcus lucimarinus* (64.17%), *Micromonas commoda* (63.30%), *Helicosporium* sp. (62.97%), *Gonium pectoral* (62.76%), *Chromochloris zofingiensis* (62.41%), *Coccomyxa subellipsoidea* (62.12%), and *Sphagnum fallax* (61.83%). The algal species, *Porphyra umbilicalis*, had the lowest percentage (29.80%) of acidic *pI* proteins. The dicot plant, *Punica granatum*, and the algal species, *Botryococcus braunii*, had a significantly lower percentage of acidic *pI* proteins (45.72% and 47.18%, respectively) relative to other plants. Principal component analysis (PCA) of acidic *pI* protein content revealed that the acidic proteins of bryophytes and monocots cluster closely to each other compared to algae and eudicot plants (Figure 1). Similarly, in the case of basic *pI* proteins, a great variation was observed for algae, eudicot and monocot plants (Figure 2). The basic *pI* proteins of bryophytes, however, were found to be consistent. A previous study reported that protein *pI* values are correlated with the sub-cellular localization of the proteins, and that the *pI* of cytosolic proteins fall below 7<sup>21</sup>. Among cytosolic proteins are those involved in 26S proteasome degradation, oxidative pentose phosphate pathway, actin/tubulin, mevalonate pathway, sugar and nucleotide biosynthesis, glycolysis, RNA

processing, and several other cellular process. Our analysis indicated that the *pI* of all cytosolic proteins does not fall in the acidic *pI* range. Ribosomal proteins, pre-mRNA splicing factors, transcription factors, auxin induced protein, extensin, senescence associated protein, cyclin dependent protein kinase and other cytoplasmic proteins had a *pI* greater than 7.

In contrast to acidic *pI* proteins, plants possess a comparatively low number of basic *pI* proteins. On average, 43.34% of the analysed plant proteins possessed a *pI* in the basic range. The highest percentage of basic *pI* proteins was found in *Porphyra umbilicalis*, where 70.09% of the proteins had a basic *pI* (Table 1). *Punica granatum* also had a high percentage (54.11%) of basic *pI* proteins (Table 1). The lowest percentage of basic *pI* proteins was found in the algal species, *Chlamydomonas eustigma* (35.56%), followed by *Ostreococcus lucimarinus* (35.65%), *Micromonas commoda* (36.52%), *Helicosporidium* sp. (36.89%), and *Gonium pectorale* (37.04%). It is difficult to establish the reason that algal species contain more acidic *pI* and less basic *pI* proteins. *Porphyra umbilicalis* is a cold-water seaweed within the family, Bangiophyceae, and it is the most domesticated marine algae. The 87.7 Mbp haploid genome of *P. umbilicalis* has a 65.8% GC content and an evolutionary study reported that the genome of *Porphyra umbilicalis* had undergone a reduction in size<sup>49</sup>. Since this species is found in the intertidal region of the ocean, it has developed the ability to cope with mid-to-high levels of tidal stress. *Porphyra* is also tolerant to UV-A and UV-B radiation<sup>49-51</sup>. The high GC content in *Porphyra umbilicalis* is directly proportional to the high percentage of basic proteins. The GC content of algal species is higher relative to other plant species and algal species possess a lower percentage of basic *pI* proteins. This suggests that, in algae, percentage GC content is inversely proportional to percentage of proteins with a basic *pI*. However, this is not true in the case of higher plants.

# ***The pI of plant proteomes exhibits a trimodal distribution***

The *pI* of the analysed plant proteins ranged from 1.99 to 13.96 and exhibited a trimodal distribution (Figure 3). Schwartz et al., previously reported a trimodal distribution of the *pI* of eukaryotic proteins<sup>21</sup>, however, they did not provide information on the number of sequences/species considered in their study. Proteins are typically soluble near their isoelectric point and the cytoplasm possesses a pH that is close to neutral. This may be the reason for the trimodal distribution of *pI*. Although the *pI* values of proteins estimated *in silico* or experimentally might be different *in vivo*, they are typically in close agreement<sup>52</sup>. Kiraga et al., (2006) reported a bimodal distribution of the *pI* of proteins from all organisms, citing acidic and basic *pI* as the basis of the modality<sup>19</sup>, where modality is defined as the set of data values that appears most often. They reported that taxonomy, ecological niche, proteome size, and sub-cellular localization are correlated with acidic and basic proteins. However, no correlation was observed in the current study between either acidic or basic *pI* of proteins with regard to taxonomy, ecological niche, or proteome size. For example, *Hordeum vulgare* and *Brassica napus* possess the largest proteomes among the studied plant species, possessing 248180 and 123465 proteins, respectively. In *H. vulgare*, 53.28% of the proteins fall in the acidic and 46.50% fall in the basic *pI* ranges; while in *B. napus*, 55.28% of the proteins have an acidic *pI* and 44.48% have a basic *pI*. Other species with smaller proteomes, however, possess a higher percentage of acidic or basic proteins (Table 1). Therefore, no correlation exists between the percentage of either acidic or basic proteins and proteome size, taxonomy, or the ecological niche of an organism. Knight et al. also reported a negative correlation between the *pI* of a protein with phylogeny of the organism<sup>53</sup>. The existence of a trimodal distribution of the *pI* of the plant proteome can be considered as a virtual 3D-gel of a plant's proteins where the *pI* of

the protein is plotted against the molecular weight of the protein. On average, 0.21% of the analysed proteins were found to have a neutral *pI* (*pI* 7), while only 0.09% of the proteins in *O. lucimarinus* fall in neutral *pI*.

### ***Leu is a high- and Trp is a low-abundant amino acid in the plant proteome***

The plant-kingdom-wide proteome analysis revealed that Leu was the most (9.62%) while Trp was the least (1.28%) abundant amino acid (Figure 4, Supplementary File 1). Leu is a nonpolar amino acid, whereas Trp contains an aromatic ring. The distribution of amino acids indicates that the synthesis of nonpolar amino acids is more favoured in the plant proteomes than the polar amino acids or those containing an aromatic ring. The average abundance of other nonpolar amino acids Ala, Gly, Ile, Met, and Val was 6.68%, 6.80%, 4.94%, 2.40%, and 6.55%, respectively (Table 2, Supplementary File 1). Trp and Tyr amino acid contain an aromatic ring and the abundance of these two proteins is relatively low in the plant proteome compared to other amino acids. Results of the conducted analysis indicated that the abundance of Ala (17.58%), Gly (11.76%), Pro (9.2%), and Arg (9.81%) were the highest; whereas, Tyr (1.33%), Gln (2.04%), Asn (1.53%), Met (1.45%), Lys (7.07%), Lys (2.08%), Ile (1.77%), Phe (2.01%), and Glu (3.52%) were the lowest in *Porphyra umbilicalis*. In a few algae and seaweeds Ala, Asp, Glu, Gly, Pro, Gln, Arg, Thr, and Val were found in high percentage while Asp, Glu, Phe, His, Ile, Lys, Leu, Met, Asn, Gln, and Ser were found in low percentage (Table 2). These observations indicate that the composition of amino acids in unicellular algae, seaweeds, and gymnosperms are more dynamic and variable than in angiosperms and other terrestrial land plants. Principal component analysis revealed that the low abundant amino acids, Trp, Tyr, His, Met, Cys, and Xaa (unknown), cluster in one group while the high abundant amino acids, Leu, Glu, Ile, Lys, and Ser, cluster in another group (Figure 5). None of the terrestrial land plants were located in the high- and low-abundant amino acid clusters. This suggests that the

proteome and amino acid composition of the land plants are more conserved and stable relative to the algae and seaweeds. PCA analysis further revealed that the *pI* of algae, eudicots, and monocots are lineage specific. The *pI* of algae, monocots, and eudicots were strongly correlated and clustered together (Figure 5). The question arises, however, as to why the plant proteome contains the highest percentage of Leu and of the lowest percentage of Trp amino acids. Do the energy requirements of the different biosynthetic pathways play a pivotal role in deciding the abundance of amino acids in a proteome? To address this question, an attempt was made to understand the role of amino acid biosynthetic pathways in determining the abundance of specific amino acids in the proteome.

Various amino acids are produced in different biosynthetic pathways<sup>54–58</sup> (Figure 6). In some cases, a few amino acids act as the substrate for the biosynthesis of other amino acids; whereas in other cases, allosteric inhibition of the biosynthesis of amino acids occurs<sup>59–61</sup>. In all of these biosynthetic pathways, ATP or NADH/NADPH are used as a source of energy, along with substrate that play a vital role in the biosynthesis of amino acids. Overall, the biosynthesis of 20 essential amino acid families are grouped by metabolic precursors<sup>62</sup> (Table 3); namely  $\alpha$ -ketoglutarate (Arg, Gln, Glu, Pro), pyruvate (Ala, Ile, Leu, Val), 3-phosphoglycerate (Cys, Gly, Ser), phosphoenolpyruvate and erythrose 4-phosphate (Phe, Trp, Tyr), oxaloacetate (Asn, Asp, Lys, Met, Thr), and ribose 5-phosphate (His) (Table 3)<sup>62</sup>. Ala, Ile, Leu, and Val are synthesized from pyruvate; Arg, Glu, Gln, and Pro are synthesized from  $\alpha$ -ketoglutarate and Gly and Ser are synthesized from 3-phosphoglycerate<sup>62</sup>; all of which have a higher abundance in the plant proteome relative to the other amino acids (Figure 6, Table 3). 3-phosphoglycerate and pyruvate are intermediates of glycolysis and the amino acids synthesized from these intermediates maintain a high abundance in the plant proteome. The intermediate, 3-phosphoglycerate, is formed in an early step of glycolysis<sup>62</sup>. The amino acids Gly and Ser are

synthesized from 3-phosphoglycerate and are also found abundantly in the plant proteome (Figure 6, Table 3). The amino acid Cys, which is also synthesized from 3-phosphoglycerate<sup>62</sup>, however, is present in low abundance (1.85%) in the plant proteome. The low abundance of Cys may be due to the allosteric inhibition. Phe (3.97), Trp (1.28%), and Try (2.67%) contain an aromatic ring and are synthesized via phosphoenolpyruvate and erythrose 4-phosphate. The aromatic amino acids are in low abundance in the plant proteome (Table). Since Phe also plays a role in the biosynthesis of Tyr, the abundance of Phe is relatively higher than Trp and Tyr. Glucose 6-phosphate gives rise to ribose 5-phosphate in a complex reaction of four steps<sup>62</sup> and His gets subsequently synthesized from ribose 5-phosphate. It is possible that the complexity of the biosynthetic pathways of amino acids containing ring compounds might be the reason for their low abundance in the plant proteome.

#### ***Plants possess selenocysteine (Sec) and other novel amino acids***

A few of the plant proteomes that were analysed had proteins containing the amino acid, selenocysteine (Sec). *C. reinhardtii*, *M. pusilla*, and *V. carteri* contained 9, 16, and 11 Sec amino acids in their proteome, respectively. Selenium containing selenoproteins are commonly found in animals but have been reported to be present in plant species. Novoselov et al., (2002) reported the presence of a selenoprotein in *C. reinhardtii*<sup>63</sup>. In our analysis, nine selenoproteins (selenoprotein H, selenoprotein K1, selenoprotein M2, selenoprotein T, selenoprotein U, selenoprotein W1, selenoprotein W2, NADPH-dependent thioredoxin reductase 1, and glutathione peroxidase) were identified in *C. reinhardtii*. In addition, *M. pusilla* was found to possess 14 Sec-containing proteins [DSBA oxidoreductase (2 no.), selenoprotein T, glutathione peroxidase (4 no.), selenoprotein W, selenoprotein, selenoprotein M, selenoprotein H, selenoprotein O, methyltransferase, and peroxiredoxin). In addition, *V. carteri* was found to possess 10 Sec containing proteins (selenoprotein T, selenoprotein K1, selenoprotein H,

selenoprotein W1, selenoprotein M2, selenoprotein U, glutathione peroxidase, membrane selenoprotein, NADPH-dependent thioredoxin reductase, and peptide methionine-S-sulfoxide reductase). To the best of our knowledge, this is the first report of selenoproteins in *M. pusilla* and *V. carteri* and the first to report of H, K1, T, U, M, M2, O, W1, and W2 selenoprotein families collectively in *C. reinhardtii*, *M. pusilla*, and *V. carteri*. The I, N, P, R, S, and V selenoprotein family members are commonly found in the animal kingdom<sup>64</sup> but are absent in *C. reinhardtii*, *M. pusilla*, and *V. carteri*. This is also the first report of the Sec-containing proteins, DSBA oxidoreductase, methyltransferase, peroxiredoxin, peptide methionine-S-sulfoxide reductase, and membrane selenoprotein in plants lineage (algae). Notably, the selenoproteins DSBA oxidoreductase, methyltransferase, peroxiredoxin, peptide methionine-S-sulfoxide reductase, and membrane selenoprotein have not been reported in animal species. Outside of algal species, no other plant species; including bryophytes, pteridophytes gymnosperms and angiosperms, were found to possess a selenoprotein.

Some plant proteomes were also found to possess a few unknown or unspecified amino acids, commonly designated as Xaa (X). Among the analysed plant species, *Aegilops tauschii*, *Amaranthus hypochondriacus*, and *Amborella trichocarpa* encoded 149377, 55412, and 25843 X amino acids, respectively. *Solanum lycopersicum* was found to contain only one X amino acid, while at least 18 species (*Solanum pennellii*, *Solanum tuberosum*, *Sorghum bicolor*, *Sphagnum fallax*, *Spinacia oleracea*, *Spirodela polyrhiza*, *Tarenaya hassleriana*, *Theobroma cacao*, *Trifolium pratense*, *Trifolium subterraneum*, *Triticum aestivum*, *Triticum urartu*, *Vigna angularis*, *Vigna radiata*, *Vigna anguiculata*, *Vitis vinifera*, *Volvox carteri*, and *Zostera marina*) were found to lack any Xaa amino acids in their proteome. Xaa amino acids are known as non-protein amino acids as they have not been associated with any specific codons. Among the studied plant species, ten were found to contain amino acid B (Asx) that codes for the

ambiguous amino acid Asn or Asp that is translated as Asp. Species that were found to possess an Asx amino acid included *Arachis duranensis* (1), *Brachypodium stacei* (40), *Dichanthelium oligosanthes* (20), *Dunaliella salina* (31), *Glycine max* (1), *Malus domestica* (4080), *Momordica charantia* (98), *Nelumbo nucifera* (64), *Prunus persica* (1), and *Trifolium pratense* (76). At least six species were found to possess a J (Xle) amino acid. Xle amino acid can encode either Leu or Ile but during translation produces Leu. Species that were found to possess Xle amino acids included *Arabidopsis thaliana* (10), *Dichanthelium oligosanthes* (11), *Malus domestica* (2175), *Momordica charantia* (39), *Nelumbo nucifera* (29), and *Trifolium pratense* (39). At least seven species were found to possess a Z (Glx) amino acid that codes for either Glu or Gln, which is subsequently translated as Glu. Species that were found to encode a Glx amino acid included *Brachypodium stacei* (20), *Dichanthelium oligosanthes* (16), *Dunaliella salina* (7), *Malus domestica* (1552), *Momordica charantia* (28), *Nelumbo nucifera* (14), and *Trifolium pratense* (25). Among the studied species, *Malus domestica* was found to contain highest number of ambiguous amino acids (Asx, Xle, and Glx). Bodley and Davie (1966) reported the incorporation of ambiguous amino acids in a peptide chain <sup>65</sup>. The presence of ethanol or streptomycin or a high magnesium ion concentration induces ambiguous coding in the peptide chain <sup>65</sup>. They reported that poly-U (uridylic acid) in the presence of a high concentration of magnesium ions or ethanol or streptomycin induces the incorporation of Leu/Ile amino acids in a peptide chain <sup>65</sup>. This explains how the specificity of the protein translation process can be altered by the presence of environmental factors. A high concentration of magnesium ions, organic solvents, antibiotics, pH, and low temperature have the ability to modify the coding specificity of a peptide chain <sup>65</sup>. Under some conditions poly-U triggers the incorporation of Leu and Ile or Phe <sup>65</sup>. *Malus domestica* is rich in magnesium ions (1%) and this might explain the presence of such a high number of ambiguous amino acids in its proteome.

## Conclusion

A proteomic analysis of the plant kingdom identified proteins with a great range of molecular mass and isoelectric points. Isoelectric points ranged from 1.99 to 13.96, covering almost the entire pH range. It is quite intriguing to think about the functions of protein at *pI* 1.99 or 13.96. Proteins with an acidic *pI* predominate over the proteins with an alkaline *pI*, and the presence of proteins with a *pI* that is near neutral is very negligible. The percentage of proteins with acidic or basic *pIs* is not related to the host cell, alkalinity or acidity of the environment. Additionally, the GC content of a genome or size distribution of the overall proteome are not directly proportional to the distribution (percent basic vs. percent acidic) of the *pI* in the proteome. The presence of Sec-containing proteins in some plant species needs to be further investigated to determine their functional role. Similarly, the presence of ambiguous amino acids in plant species should be further evaluated individually to understand whether these ambiguous amino acids are encoded by any specific codon in mRNA. A major question arises from this study is, whether the incorporation of ambiguous amino acids in the peptide chain of the protein brings any impact at the gene/genome level and incorporate the respective codon for the ambiguous amino acid and regulated genomic rearrangement through reverse central dogma approach. The presence of a pyrrolysine amino acid in the plant kingdom was not observed in the present study.

## Methods

Protein sequences of the entire proteome of the analysed plant species were downloaded from the National Center for Biotechnology Information (NCBI) and Phytozome, DOE Joint Genome Institute (<https://phytozome.jgi.doe.gov/pz/portal.html>). All of the studied sequences were annotated nuclear-encoded proteins. The isoelectric point of each protein of each of the analysed plant species was calculated individually using the Python-based command line

“Protein isoelectric point calculator” (IPC Python) in a Linux platform<sup>2</sup>. The source code used was as written by Kozlowski (2016).

Once the molecular mass and isoelectric point of the proteins in each species was determined, they were separated into acidic and basic *pI* categories. Subsequently, the average *pI* and percentage of proteins in each category was calculated using a Microsoft excel worksheet. A graph comparison of isoelectric point versus molecular mass was prepared using a python-based platform. Pearson-correlation ( $r=0.19$ ,  $p = 0$ ) was used for the association analysis of molecular mass and isoelectric point. The X-axis data statistics were as follows: mean, 4.717365e+01; std, 3.662983e+01; min, 8.909000e-02; 25%, 2.279452e+01; 50%, 3.874486e+01; 75%, 5.999628e+01, and max, 2.236803e+03. The Y-axis data statistics were: mean, 6.840657e+00; std, 1.594912e+00; min, 1.990000e+00; 25%, 5.537000e+00; 50%, 6.605000e+00; 75%, 8.053000e+00, and max, 1.396300e+01.

### ***Principal component analysis***

Principal component analysis of the plant proteome parameters was carried out using a portable Unscrambler software version 9.7 using the excel file format. For acidic and basic *pI*, the plant proteome data were grouped according to the plant lineage algae, bryophyte, monocot, and eudicot plants. The average of acidic and basic *pI* was used to construct the PCA plot. Similarly, amino acid abundance was also analysed in relation to algae, bryophyte, eudicot, and monocot lineage.

## References

1. Kirkwood, J., Hargreaves, D., O'Keefe, S. & Wilson, J. Using isoelectric point to determine the pH for initial protein crystallization trials. *Bioinformatics* **31**, 1444–1451 (2015).
2. Kozlowski, L. P. IPC – Isoelectric Point Calculator. *Biol. Direct* **11**, 55 (2016).
3. Kozlowski, L. P. Proteome-pI: proteome isoelectric point database. *Nucleic Acids Res.* **45**, D1112–D1116 (2017).
4. Stekhoven, F., Gorissen, M. & Flik, G. The isoelectric point, a key to understanding a variety of biochemical problems: a minireview. *Fish Physiol. Biochem.* **34**, 1–8 (2008).
5. Kenneth, W., Kenneth, G. & Raymond, E. *General Chemistry*. (Saunders College Publishing, 1992).
6. Pace, C. N., Grimsley, G. R. & Scholtz, J. M. Protein ionizable groups: pK values and their contribution to protein stability and solubility. *J. Biol. Chem.* **284**, 13285–13289 (2009).
7. Grimsley, G. R., Scholtz, J. M. & Pace, C. N. A summary of the measured pK values of the ionizable groups in folded proteins. *Protein Sci.* **18**, 247–251 (2009).
8. Masunov, A. & Lazaridis, T. Potentials of Mean Force between Ionizable Amino Acid Side Chains in Water. *J. Am. Chem. Soc.* **125**, 1722–1730 (2003).
9. Zhu, K., Zhao, J., Lubman, D. M., Miller, F. R. & Barder, T. J. Protein pI Shifts due to Posttranslational Modifications in the Separation and Characterization of Proteins. *Anal. Chem.* **77**, 2745–2755 (2005).
10. Locke, D., Koreen, I. V & Harris, A. L. Isoelectric points and post-translational modifications of connexin26 and connexin32. *FASEB J.* **20**, 1221–1223 (2006).
11. Youden, W. J. & Denny, F. E. Factors Influencing the pH Equilibrium Known as the Isoelectric Point of Plant Tissue. *Am. J. Bot.* **13**, 743–753 (1926).
12. Shaw, K. L., Grimsley, G. R., Yakovlev, G. I., Makarov, A. A. & Pace, C. N. The effect of net charge on the solubility, activity, and stability of ribonuclease Sa. *Protein Sci.* **10**, 1206–1215 (2001).
13. Saraswathy, N. & Ramalingam, P. Introduction to proteomics. in *Woodhead Publishing Series in Biomedicine* (eds. Saraswathy, N. & Ramalingam, P. B. T.-C. and T. in G. and P.) 147–158 (Woodhead Publishing, 2011).  
doi:<https://doi.org/10.1533/9781908818058.147>
14. Gygi, S. P., Corthals, G. L., Zhang, Y., Rochon, Y. & Aebersold, R. Evaluation of two-dimensional gel electrophoresis-based proteome analysis technology. *Proc. Natl. Acad. Sci.* **97**, 9390 LP-9395 (2000).
15. Rabilloud, T. & Lelong, C. Two-dimensional gel electrophoresis in proteomics: A tutorial. *J. Proteomics* **74**, 1829–1841 (2011).
16. Kumar, M. *et al.* An Improved 2-Dimensional Gel Electrophoresis Method for Resolving Human Erythrocyte Membrane Proteins. *Proteomics Insights* **8**, 1178641817700880 (2017).
17. Anderson, J. C. & Peck, S. C. A simple and rapid technique for detecting protein phosphorylation using one-dimensional isoelectric focusing gels and immunoblot analysis. *Plant J.* **55**, 881–885 (2008).
18. Jones, L. R., Simmerman, H. K., Wilson, W. W., Gurd, F. R. & Wegener, A. D. Purification and characterization of phospholamban from canine cardiac sarcoplasmic reticulum. *J. Biol. Chem.* **260**, 7721–7730 (1985).
19. Kiraga, J. *et al.* The relationships between the isoelectric point and: length of proteins, taxonomy and ecology of organisms. *BMC Genomics* **8**, 163 (2007).
20. Carugo, O. Isoelectric points of multi-domain proteins. *Bioinformation* **2**, 101–104 (2007).

21. Schwartz, R., Ting, C. S. & King, J. Whole proteome pI values correlate with subcellular localizations of proteins for organisms within the three domains of life. *Genome Res.* **11**, 703–709 (2001).
22. Labeit, S. *et al.* A regular pattern of two types of 100-residue motif in the sequence of titin. *Nature* **345**, 273 (1990).
23. Kurzban, G. P. & Wang, K. Giant polypeptides of skeletal muscle titin: Sedimentation equilibrium in guanidine hydrochloride. *Biochem. Biophys. Res. Commun.* **150**, 1155–1161 (1988).
24. Kurisu, G., Zhang, H., Smith, J. L. & Cramer, W. A. Structure of the Cytochrome b6f Complex of Oxygenic Photosynthesis: Tuning the Cavity. *Science* (80-. ). **302**, 1009 LP-1014 (2003).
25. Leister, D. & Schneider, A. B. T.-. From Genes to Photosynthesis in *Arabidopsis thaliana*. *Int. Rev. Cytol.* **228**, 31–83 (2003).
26. Barbagallo, R. P., Finazzi, G. & Forti, G. Effects of Inhibitors on the Activity of the Cytochrome b6f Complex: Evidence for the Existence of Two Binding Pockets in the Lumenal Site. *Biochemistry* **38**, 12814–12821 (1999).
27. Cramer, W. A. *et al.* Some New Structural Aspects And Old Controversies Concerning The Cytochrome B6f Complex Of Oxygenic Photosynthesis. *Annu. Rev. Plant Physiol. Plant Mol. Biol.* **47**, 477–508 (1996).
28. Kallas, T. The Cytochrome b6f Complex. in *The Molecular Biology of Cyanobacteria* (ed. Bryant, D. A.) 259–317 (Springer Netherlands, 1994). doi:10.1007/978-94-011-0227-8\_9
29. Filomeni, G., Rotilio, G. & Ciriolo, M. R. Cell signalling and the glutathione redox system. *Biochem. Pharmacol.* **64**, 1057–1064 (2002).
30. Zhang, H. & Forman, H. J. Glutathione synthesis and its role in redox signaling. *Semin. Cell Dev. Biol.* **23**, 722–728 (2012).
31. Aquilano, K., Baldelli, S. & Ciriolo, M. R. Glutathione: new roles in redox signaling for an old antioxidant. *Front. Pharmacol.* **5**, 196 (2014).
32. Su, M., Ling, Y., Yu, J., Wu, J. & Xiao, J. Small proteins: untapped area of potential biological importance. *Front. Genet.* **4**, 286 (2013).
33. Setlow, P. I will survive: DNA protection in bacterial spores. *Trends Microbiol.* **15**, 172–180 (2007).
34. Schalk, C. *et al.* Small RNA-mediated repair of UV-induced DNA lesions by the DNA DAMAGE-BINDING PROTEIN 2 and ARGONAUTE 1. *Proc. Natl. Acad. Sci. U. S. A.* **114**, E2965–E2974 (2017).
35. Xue, Y. *et al.* Tff3, as a Novel Peptide, Regulates Hepatic Glucose Metabolism. *PLoS One* **8**, e75240 (2013).
36. Basrai, M. a, Hieter, P. & Boeke, J. D. Small Open Reading Frames : Beautiful Needles in the Haystack Small Open Reading Frames : Beautiful Needles in the Haystack. *Genome Res.* **7**, 768–771 (1997).
37. Ramírez-Sánchez, O., Pérez-Rodríguez, P., Delaye, L. & Tiessen, A. Plant Proteins Are Smaller Because They Are Encoded by Fewer Exons than Animal Proteins. *Genomics. Proteomics Bioinformatics* **14**, 357–370 (2016).
38. Tiessen, A., Pérez-Rodríguez, P. & Delaye-Arredondo, L. J. Mathematical modeling and comparison of protein size distribution in different plant, animal, fungal and microbial species reveals a negative correlation between protein size and protein number, thus providing insight into the evolution of proteomes. *BMC Res. Notes* **5**, 85 (2012).
39. Purugganan, M. & Wessler, S. The splicing of transposable elements and its role in intron evolution. *Genetica* **86**, 295–303 (1992).

40. Huff, J. T., Zilberman, D. & Roy, S. W. Mechanism for DNA transposons to generate introns on genomic scales. *Nature* **538**, 533–536 (2016).
41. Lee, S.-I. & Kim, N.-S. Transposable elements and genome size variations in plants. *Genomics Inform.* **12**, 87–97 (2014).
42. Plasterk, R. H. A. *Transposable Elements. Encyclopedia of Genetics* (Academic Press, 2001). doi:<https://doi.org/10.1006/rwgn.2001.1316>
43. Martin, W. *et al.* Evolutionary analysis of Arabidopsis, cyanobacterial, and chloroplast genomes reveals plastid phylogeny and thousands of cyanobacterial genes in the nucleus. *Proc. Natl. Acad. Sci. U. S. A.* **99**, 12246–12251 (2002).
44. Sloan, D. B. & Moran, N. A. Genome Reduction and Co-evolution between the Primary and Secondary Bacterial Symbionts of Psyllids. *Mol. Biol. Evol.* **29**, 3781–3792 (2012).
45. Mohanta, T. K., Pudake, R. N. & Bae, H. Genome-wide identification of major protein families of cyanobacteria and genomic insight into the circadian rhythm. *Eur. J. Phycol.* **52**, (2017).
46. Reyes-Prieto, A., Weber, A. P. M. & Bhattacharya, D. The Origin and Establishment of the Plastid in Algae and Plants. *Annu. Rev. Genet.* **41**, 147–168 (2007).
47. Martin, W. *et al.* Gene transfer to the nucleus and the evolution of chloroplasts. *Nature* **393**, 162 (1998).
48. Mallick, P., Boutz, D. R., Eisenberg, D. & Yeates, T. O. Genomic evidence that the intracellular proteins of archaeal microbes contain disulfide bonds. *Proc. Natl. Acad. Sci. U. S. A.* **99**, 9679–9684 (2002).
49. Brawley, S. H. *et al.* Insights into the red algae and eukaryotic evolution from the genome of *Porphyra umbilicalis* (Bangioophyceae, Rhodophyta). *Proc. Natl. Acad. Sci.* **114**, E6361 LP-E6370 (2017).
50. Dring, M. J., Wagner, A., Boeskov, J. & Lüning, K. Sensitivity of intertidal and subtidal red algae to UVA and UVB radiation, as monitored by Chlorophyll fluorescence measurements: Influence of collection depth and season, and length of irradiation. *Eur. J. Phycol.* **31**, 293–302 (1996).
51. Gröniger, A., Hallier, C. & Häder, D. P. Influence of UV radiation and visible light on *Porphyra umbilicalis*: Photoinhibition and MAA concentration. *J. Appl. Phycol.* **11**, 437 (1999).
52. Sillero, A. & Ribeiro, J. M. Isoelectric points of proteins: Theoretical determination. *Anal. Biochem.* **179**, 319–325 (1989).
53. Knight, C. G., Kassen, R., Hebestreit, H. & Rainey, P. B. Global analysis of predicted proteomes: functional adaptation of physical properties. *Proc. Natl. Acad. Sci. U. S. A.* **101**, 8390–8395 (2004).
54. Gibson, F. & Pittard, J. Pathways of biosynthesis of aromatic amino acids and vitamins and their control in microorganisms. *Bacteriol. Rev.* **32**, 465–492 (1968).
55. Tzin, V. & Galili, G. New Insights into the Shikimate and Aromatic Amino Acids Biosynthesis Pathways in Plants. *Mol. Plant* **3**, 956–972 (2010).
56. Szabados, L. & Savouré, A. Proline: a multifunctional amino acid. *Trends Plant Sci.* **15**, 89–97 (2010).
57. Galili, G. & Höfgen, R. Metabolic Engineering of Amino Acids and Storage Proteins in Plants. *Metab. Eng.* **4**, 3–11 (2002).
58. Yoshida, S. Biosynthesis and Conversion of Aromatic Amino Acids in Plants. *Annu. Rev. Plant Physiol.* **20**, 41–62 (1969).
59. Light, S. H. & Anderson, W. F. The diversity of allosteric controls at the gateway to aromatic amino acid biosynthesis. *Protein Sci.* **22**, 395–404 (2013).
60. Berg, J., Tymoczko, J. & Stryer, L. Amino Acid Biosynthesis Is Regulated by

- Feedback Inhibition. in *Biochemistry* (WH Freeman, 2002).
61. Nelson, D. & Cox, M. Amino acid biosynthesis is under allosteric regulation. in *Lehlingers Principle of Biochemistry* (ed. Lehninger, A. L.) 833–880 (2005).
62. Nelson, D. & Cox, M. Biosynthesis of amino acids, nucleotides, and related molecules. in *Lehlinger Principles of Biochemistry* 842 (W.H. Freeman and Company, 2005).
63. Novoselov, S. V *et al.* Selenoproteins and selenocysteine insertion system in the model plant cell system, *Chlamydomonas reinhardtii*. *EMBO J.* **21**, 3681–3693 (2002).
64. Reeves, M. A. & Hoffmann, P. R. The human selenoproteome: recent insights into functions and regulation. *Cell. Mol. Life Sci.* **66**, 2457–2478 (2009).
65. Bodley, J. W. & Davie, E. W. A study of the mechanism of ambiguous amino acid coding by poly U: the nature of the products. *J. Mol. Biol.* **18**, 344–355 (1966).

656 **Table 1**  
657 Details of plant proteome. Table shows acidic *pI* of proteins predominates the basic *pI*. However, in sea weed *Porphyra umbilicalis*, basic *pI*  
658 predominates over the acidic *pI*. Putative polyketide synthase type I found in lower eukaryote *Volvox carteri* was found to be the largest protein in  
659 the plant lineage. However, titin was found to be the largest protein in the higher eukaryotic land plants. Asterisks represents no specific data  
660 available for the said item.

| Name of the species                   | Total No. Of Protein Sequences Studied | Highest Mol. Wt. (kDa) of Protein | Name of the Protein with Highest Mol. Wt. | Lowest Mol. Wt. (kDa) of Protein | Name of the Protein with lowest Mol. Wt. | Highest <i>pI</i> of Protein | Name of the Protein with highest <i>pI</i> | Lowest <i>pI</i> of Protein | Name of the Protein with lowest <i>pI</i> | No. Of Proteins in Acidic <i>pI</i> | No. Of Proteins in Basic <i>pI</i> | No. Of Proteins in Neutral <i>pI</i> | Average of Acidic <i>pI</i> | Average of basic <i>pI</i> |
|---------------------------------------|----------------------------------------|-----------------------------------|-------------------------------------------|----------------------------------|------------------------------------------|------------------------------|--------------------------------------------|-----------------------------|-------------------------------------------|-------------------------------------|------------------------------------|--------------------------------------|-----------------------------|----------------------------|
| <i>Aegilops tauschii</i>              | 55713                                  | 605.202                           | Misin                                     | 3.169                            | Cyt b6/f VIII                            | 13.159                       | SARMP 2-like                               | 2.409                       | Nucleolin-like                            | 30488                               | 25116                              | 109                                  | 5.64                        | 8.75                       |
| <i>Amaranthus hypochondriacus</i>     | 23879                                  | 596.11                            | Unknown                                   | 0.63                             | Unknown                                  | 12.67                        | Unknown                                    | 2.498                       | Unknown                                   | 13009                               | 10833                              | 37                                   | 5.58                        | 8.36                       |
| <i>Amborella trichopoda</i>           | 27313                                  | 554.72                            | Unknown                                   | 4.32                             | Unknown                                  | 12.93                        | Unknown                                    | 2.587                       | Unknown                                   | 14583                               | 12677                              | 53                                   | 5.53                        | 8.56                       |
| <i>Anacardium occidentale</i>         | 82170                                  | 457.50                            | Unknown                                   | 3.10                             | Unknown                                  | 12.61                        | Unknown                                    | 2.58                        | Unknown                                   | 46898                               | 35100                              | 172                                  | 5.65                        | 8.27                       |
| <i>Ananas comosus</i>                 | 35775                                  | 605.85                            | Midasin                                   | 3.16                             | Cyt b6/f VIII                            | 12.89                        | Unknown                                    | 3.14                        | PPCD VHS3-like                            | 20268                               | 15399                              | 108                                  | 5.68                        | 8.35                       |
| <i>Aquilegia coerulea</i>             | 41063                                  | 620.28                            | Unknown                                   | 3.82                             | Unknown                                  | 12.74                        | Unknown                                    | 2.85                        | Unknown                                   | 23818                               | 17169                              | 76                                   | 5.64                        | 8.26                       |
| <i>Arabidopsis halleri</i>            | 26911                                  | 609.56                            | Unknown                                   | 3.18                             | Unknown                                  | 12.50                        | Unknown                                    | 3.10                        | Unknown                                   | 14727                               | 12123                              | 61                                   | 5.59                        | 8.32                       |
| <i>Arabidopsis lyrata</i>             | 39161                                  | 611.10                            | Midasin                                   | 2.51                             | Unknown                                  | 12.74                        | 60S RP L41                                 | 2.85                        | RNA Pol. II Med 17                        | 22213                               | 16854                              | 94                                   | 5.62                        | 8.26                       |
| <i>Arabidopsis thaliana</i>           | 48350                                  | 611.88                            | Misin-like                                | 0.57                             | Hypothetical                             | 12.74                        | 60S RP L41                                 | 2.75                        | Glycine-rich protein                      | 27305                               | 20926                              | 119                                  | 5.61                        | 8.31                       |
| <i>Arabis alpina</i>                  | 23286                                  | 565.05                            | Unknown                                   | ***                              | ****                                     | 12.79                        | Unknown                                    | 2.14                        | Unknown                                   | 13427                               | 9810                               | 49                                   | 5.52                        | 8.37                       |
| <i>Arachis duranensis</i>             | 52826                                  | 617.77                            | Misin                                     | 4.11                             | DDHGT 4A                                 | 12.72                        | PERK2                                      | 2.96                        | Unknown                                   | 29514                               | 23184                              | 128                                  | 5.67                        | 8.25                       |
| <i>Arachis ipaensis</i>               | 57621                                  | 617.63                            | Misin                                     | 4.08                             | DDHGT 4A                                 | 12.36                        | Unknown                                    | 3.13                        | Small acidic protein                      | 31471                               | 26007                              | 143                                  | 5.67                        | 8.26                       |
| <i>Asparagus officinalis</i>          | 36763                                  | 608.71                            | Misin                                     | 4.28                             | DDHGT 4A                                 | 12.50                        | protein TPRXL                              | 2.89                        | FS CAYBR BP                               | 20748                               | 15934                              | 81                                   | 5.64                        | 8.25                       |
| <i>Auxenochlorella protothecoides</i> | 7014                                   | 1649.26                           | PKS                                       | ***                              | ***                                      | 13.21                        | Mucin-I                                    | 2.35                        | Hypothetical protein                      | 4131                                | 2874                               | 9                                    | 5.52                        | 8.91                       |
| <i>Bathycoccus prasinos</i>           | 7900                                   | 1814.10                           | Unnamed                                   | 3.32                             | Ycf12                                    | 12.74                        | Unknown                                    | 3.42                        | Unknown                                   | 4799                                | 3093                               | 8                                    | 5.47                        | 8.38                       |
| <i>Beta vulgaris</i>                  | 32874                                  | 617.35                            | Misin                                     | 3.56                             | Unknown                                  | 12.55                        | Proline-rich P                             | 3.16                        | Shematin-like 2                           | 18770                               | 14017                              | 87                                   | 5.68                        | 8.19                       |
| <i>Botryococcus braunii</i>           | 23685                                  | 522.853                           | Unknown                                   | 3.068                            | Unknown                                  | 12.82                        | Unknown                                    | 2.21                        | Unknown                                   | 11176                               | 12439                              | 70                                   | 5.61                        | 8.66                       |

|                                   |        |         |              |       |                 |       |                 |      |                                  |       |       |     |      |      |
|-----------------------------------|--------|---------|--------------|-------|-----------------|-------|-----------------|------|----------------------------------|-------|-------|-----|------|------|
| <i>Brachipodium stacei</i>        | 36357  | 605.43  | Unknown      | 3.023 | Unknown         | 12.88 | Unknown         | 3.05 | Unknown                          | 19318 | 16954 | 85  | 5.67 | 8.59 |
| <i>Brachipodium sylvaticum</i>    | 50263  | 608.40  | Unknown      | 3.14  | Unknown         | 12.88 | Unknown         | 3.00 | Unknown                          | 26022 | 24130 | 111 | 5.66 | 8.82 |
| <i>Brachipodium distachyon</i>    | 33944  | 605.24  | Misin        | 3.16  | Cyt b6/f VIII   | 12.39 | Unknown         | 3.03 | Prothymosin $\alpha$ -B-like     | 19814 | 14052 | 78  | 5.67 | 8.35 |
| <i>Brachypodium hybridum</i>      | 80980  | 605.62  | Unknown      | 3.02  | Unknown         | 13.14 | Unknown         | 3.05 | Unknown                          | 40744 | 40092 | 144 | 5.66 | 8.79 |
| <i>Brassica napus</i>             | 123465 | 606.90  | Misin-like   | 3.15  | petN            | 12.57 | IQ domain 31    | 2.75 | Shematin-like 2                  | 68255 | 54929 | 281 | 5.62 | 8.29 |
| <i>Brassica oleracea</i>          | 56687  | 606.74  | Misin        | 3.48  | Unknown         | 12.54 | IQ domain 31    | 2.75 | Shematin-like 2                  | 31109 | 25432 | 146 | 5.62 | 8.29 |
| <i>Brassica rapa</i>              | 52553  | 607.93  | Misin        | 3.33  | Unknown         | 12.57 | IQ domain 31    | 2.48 | Dentin-sialophospho Protein-like | 29429 | 23004 | 120 | 5.62 | 8.29 |
| <i>Cajanus cajan</i>              | 38965  | 619.70  | Misin        | 3.42  | Cyt b6/f VIII   | 12.44 | CLAVATA 3/ESR   | 2.82 | RPB1-like                        | 22092 | 16793 | 80  | 5.71 | 8.22 |
| <i>Camelina sativa</i>            | 107481 | 610.42  | Misin-like   | 2.61  | Peptide POLARIS | 12.72 | SARMP 2-like    | 2.13 | TsetseEP-like                    | 60623 | 46584 | 274 | 5.61 | 8.26 |
| <i>Capsella grandiflora</i>       | 26561  | 593.86  | Unknown      | 3.41  | Unknown         | 12.44 | Unknown         | 2.80 | Unknown                          | 14831 | 11661 | 61  | 5.62 | 8.30 |
| <i>Capsella rubella</i>           | 34126  | 610.40  | Misin        | 3.57  | Unknown         | 12.44 | Lifeguard 1     | 3.13 | Unknown                          | 19477 | 14578 | 71  | 5.63 | 8.25 |
| <i>Capsicum annuum</i>            | 45410  | 617.56  | Misin        | 3.16  | Cyt b6/f VIII   | 12.79 | GRCW protein    | 2.75 | GRCW protein 1                   | 25339 | 19970 | 101 | 5.67 | 8.24 |
| <i>Capsicum baccatum</i>          | 35853  | 553.75  | Auxin TP BIG | 3.16  | Cyt b6/f VIII   | 12.64 | Hypothetical al | 1.99 | Hypothetical                     | 20479 | 15300 | 74  | 5.55 | 8.42 |
| <i>Capsicum chinense</i>          | 34973  | 550.87  | Auxin TP BIG | 3.16  | Cyt b6/f VIII   | 13.21 | Hypothetical al | 2.24 | Hypothetical                     | 20497 | 14398 | 79  | 5.56 | 8.25 |
| <i>Carica papaya</i>              | 26103  | 446.01  | Unknown      | 3.16  | Cyt b6/f VIII   | 12.29 | 50S RP L34      | 3.10 | Small acidic protein             | 14512 | 11526 | 65  | 5.67 | 8.25 |
| <i>Cephalotus follicularis</i>    | 36667  | 611.81  | AAA_5        | ***   | ****            | 13.04 | Hypothetical al | 2.9  | Hypothetical                     | 18643 | 17959 | 65  | 5.66 | 8.33 |
| <i>Chenopodium quinoa</i>         | 63173  | 621.14  | Misin-like   | 3.16  | petN            | 12.22 | SR45-like       | 3.02 | Unknown                          | 36037 | 26973 | 163 | 5.66 | 8.18 |
| <i>Chlamydomonas eustigma</i>     | 14161  | 1370.23 | Unknown      | 2.28  | Unknown         | 13.14 | Unknown         | 2.18 | Unknown                          | 9089  | 5036  | 36  | 5.64 | 8.23 |
| <i>Chlamydomonas reinhardtii</i>  | 14488  | 2056.44 | PKS          | 1.46  | Unknown         | 13.34 | Unknown         | 2.40 | Unknown                          | 7427  | 7029  | 32  | 5.64 | 8.7  |
| <i>Chlorella variabilis</i>       | 9780   | 1159.35 | Unknown      | 4.91  | Unknown         | 12.73 | Unknown         | 2.88 | Unknown                          | 5883  | 3876  | 21  | 5.55 | 8.55 |
| <i>Chromochloris zofingiensis</i> | 15369  | 1932.21 | Unknown      | 2.34  | Unknown         | 12.5  | Unknown         | 2.54 | Unknown                          | 9592  | 5740  | 37  | 5.61 | 8.35 |
| <i>Cicer arietinum</i>            | 33107  | 616.07  | Unknown      | 3.02  | Unknown         | 12.25 | Unknown         | 3.14 | Unknown                          | 19043 | 13979 | 85  | 5.69 | 8.20 |
| <i>Citrus clementina</i>          | 34557  | 588.15  | Unknown      | ****  | ****            | 12.44 | Unknown         | 2.95 | Unknown                          | 19332 | 15151 | 74  | 5.67 | 8.28 |

|                                   |       |         |               |      |               |       |                  |      |                               |       |       |     |      |      |
|-----------------------------------|-------|---------|---------------|------|---------------|-------|------------------|------|-------------------------------|-------|-------|-----|------|------|
| <i>Citrus sinensis</i>            | 35648 | 617.00  | Misin         | 3.16 | Cyt b6/f VIII | 12.25 | Unknown          | 2.93 | Circumsporozoite protein-like | 20887 | 14680 | 81  | 5.69 | 8.18 |
| <i>Citrus unshiu</i>              | 37970 | 684.122 | Unknown       | 0.54 | Unknown       | 12.83 | Unknown          | 2.74 | Unknown                       | 20954 | 16926 | 90  | 5.67 | 8.34 |
| <i>Coccomyxa subellipsoidea</i>   | 9839  | 1632.35 | Ketoacyl-synt | 5.06 | Unknown       | 12.99 | Unknown          | 3.05 | Unknown                       | 6112  | 3708  | 19  | 5.53 | 8.55 |
| <i>Corchorus capsularis</i>       | 29356 | 606.73  | Unknown       | 1.6  | Unknown       | 12.74 | Unknown          | 2.72 | IMP                           | 15540 | 13783 | 33  | 5.49 | 8.67 |
| <i>Corchorus olitorius</i>        | 35704 | 498.84  | ZRF           | 2.79 | Unknown       | 12.79 | Unknown          | 2.56 | Unknown                       | 19280 | 16359 | 65  | 5.49 | 8.62 |
| <i>Cucumis melo</i>               | 29796 | 616.61  | Misin         | 2.87 | Unknown       | 13.23 | Unknown          | 2.56 | Loricin-like                  | 17151 | 12562 | 83  | 5.7  | 8.24 |
| <i>Cucumis sativus</i>            | 29796 | 617.61  | Misin         | 2.87 | Unknown       | 13.23 | Unknown          | 2.56 | Loricin-like                  | 17151 | 12562 | 83  | 5.7  | 8.24 |
| <i>Cucurbita maxima</i>           | 42777 | 615.95  | Misin         | 3.58 | Unknown       | 12.22 | 60S RP L39       | 2.54 | CWP gp 1-like                 | 24870 | 17817 | 90  | 5.68 | 8.25 |
| <i>Cucurbita moschata</i>         | 43715 | 615.32  | Misin         | 4.1  | DDGT 4A       | 12.85 | EPR1             | 2.31 | PKDP                          | 25399 | 18233 | 83  | 5.67 | 8.25 |
| <i>Daucus carota</i>              | 44655 | 619.12  | Misin         | 3.16 | Cyt b6/f VIII | 12.32 | Ribo Protein L32 | 2.79 | Loricin                       | 26135 | 18423 | 97  | 5.68 | 8.16 |
| <i>Dendrobium officinale</i>      | 34527 | 616.94  | Misin         | 3.16 | Cyt b6/f VIII | 12.45 | 60S RP L39       | 3.23 | Unknown                       | 19029 | 15425 | 73  | 5.69 | 8.26 |
| <i>Dichanthelium oligosanthes</i> | 26468 | 538.41  | Auxin TP BIG  | 1.09 | Unknown       | 13.18 | Unknown          | 3.00 | Unknown                       | 14146 | 12261 | 61  | 5.6  | 8.63 |
| <i>Dorcoceras hygrometricum</i>   | 47778 | 563.43  | Midasin       | 4.75 | Unknown       | 12.86 | Unknown          | 2.68 | Unknown                       | 23461 | 24237 | 80  | 5.44 | 8.92 |
| <i>Dunaliella salina</i>          | 18801 | 603.54  | Unknown       | 2.92 | Unknown       | 12.69 | Unknown          | 2.38 | Unknown                       | 9927  | 8833  | 41  | 5.66 | 8.53 |
| <i>Durio zibethinus</i>           | 63007 | 620.96  | Misin         | 3.57 | Unknown       | 12.35 | SR45-like        | 3.12 | Acidic protein                | 37032 | 25800 | 175 | 5.68 | 8.21 |
| <i>Elaeis guineensis</i>          | 41887 | 614.29  | Misin         | 3.19 | Cyt b6/f VIII | 12.35 | 50S RP L34       | 3.28 | Calsequestrin 1-like          | 24529 | 17266 | 92  | 5.69 | 8.29 |
| <i>Erythranthe guttata</i>        | 31861 | 611.80  | Misin         | 3.77 | Unknown       | 12.14 | SR45             | 2.6  | CSF subunit 2                 | 18284 | 13500 | 77  | 5.63 | 8.22 |
| <i>Eucalyptus grandis</i>         | 52554 | 644.40  | Futsch        | 3.4  | Cyt b6/f VIII | 12.83 | Unknown          | 3.07 | Fimbrin 1-like                | 31377 | 21034 | 143 | 5.69 | 8.24 |
| <i>Eutrema salsugineum</i>        | 29485 | 609.35  | Unknown       | ***  | ****          | 12.32 | Unknown          | 3.05 | Unknown                       | 16105 | 13300 | 80  | 5.63 | 8.32 |
| <i>Fragaria vesca</i>             | 31387 | 609.82  | Misin         | 3.19 | Cyt b6/f VIII | 12.34 | 50S RP L34       | 3.13 | Prostatic spermine BP         | 18862 | 12429 | 96  | 5.65 | 8.20 |
| <i>Genlisea aurea</i>             | 17685 | 559.24  | Unknown       | 4.94 | Unknown       | 12.89 | Unknown          | 2.93 | Unknown                       | 9842  | 7814  | 29  | 5.54 | 8.51 |
| <i>Glycine max</i>                | 71523 | 619.18  | Misin-like    | 1.34 | AAPT          | 12.28 | Unknown          | 2.67 | HC1-like                      | 41545 | 29785 | 193 | 5.68 | 8.22 |
| <i>Glycine soja</i>               | 50399 | 603.79  | Misin         | 1.59 | Hypothetical  | 12.42 | Dynein           | 2.21 | RBP 12B                       | 28254 | 22054 | 91  | 5.62 | 8.34 |
| <i>Gonium pectorale</i>           | 16290 | 881.59  | Unknown       | 5.02 | Unknown       | 12.88 | Unknown          | 2.48 | Unknown                       | 10225 | 6034  | 31  | 5.52 | 8.54 |

|                                   |        |         |                      |      |                            |       |                                    |      |                            |        |        |     |      |      |
|-----------------------------------|--------|---------|----------------------|------|----------------------------|-------|------------------------------------|------|----------------------------|--------|--------|-----|------|------|
| <i>Gossypium arboreum</i>         | 47568  | 806.46  | Titin-like           | 3.16 | Cyt b6/f VIII              | 12.23 | SR45-like                          | 2.91 | Loricin-like               | 26844  | 20612  | 103 | 5.69 | 8.23 |
| <i>Gossypium hirsutum</i>         | 90927  | 750.00  | Titin-like           | 3.16 | Cyt b6/f VIII              | 12.26 | SARMP 2-like                       | 2.67 | ER TF TINY-like            | 51343  | 39336  | 248 | 5.67 | 8.25 |
| <i>Gossypium raimondii</i>        | 59057  | 802.74  | Titin-like           | 3.16 | Cyt b6/f VIII              | 12.25 | SR45                               | 2.98 | Arabinogalactan 11         | 33377  | 25561  | 119 | 5.67 | 8.25 |
| <i>Handroanthus impetiginosus</i> | 30271  | 475.38  | Unknown              | 2.91 | Unknown                    | 12.66 | Unknown                            | 2.95 | Unknown                    | 16255  | 13959  | 57  | 5.64 | 8.36 |
| <i>Helianthus annuus</i>          | 73839  | 1300.83 | Unknown              | 2.76 | Unknown                    | 12.88 | C1E8.05-like                       | 2.62 | Prostatic spermine BP      | 40355  | 33310  | 174 | 5.63 | 8.25 |
| <i>Helicosporidium sp.</i>        | 6033   | 245.59  | Unknown              | ***  | ***                        | 12.79 | Unknown                            | 2.82 | Unknown                    | 3799   | 2226   | 8   | 5.32 | 8.92 |
| <i>Herrania umbratica</i>         | 27748  | 620.76  | Misin                | 4.23 | DDGT 4A                    | 12.66 | Unknown                            | 3.12 | Small acidic protein 1     | 16209  | 11492  | 47  | 5.7  | 8.21 |
| <i>Hevea brasiliensis</i>         | 58062  | 620.10  | Misin                | 3.16 | Cyt b6/f VIII              | 12.16 | 50S RP L35                         | 3.12 | Small acidic protein 1     | 33994  | 23952  | 116 | 5.69 | 8.20 |
| <i>Hordeum vulgare</i>            | 248180 | 607.08  | Unknown              | 1.75 | Unknown                    | 13.11 | ****                               | 2.52 | Unknown                    | 132250 | 115421 | 509 | 5.60 | 8.62 |
| <i>Ipomoea nil</i>                | 51054  | 636.34  | Filaggrin-like       | 3.16 | Cyt b6/f VIII              | 12.38 | Formin 2-like                      | 2.82 | Nucleolin-like             | 29183  | 21727  | 144 | 5.69 | 8.18 |
| <i>Jatropha curcas</i>            | 32547  | 628.22  | Titin                | 3.16 | petN                       | 12.14 | 60S RP L39-3                       | 3.13 | Glycin-rich protein        | 18939  | 13531  | 77  | 5.69 | 8.18 |
| <i>Juglans regia</i>              | 55627  | 624.15  | Midasin              | 4.14 | 40S RP S29-like            | 12.98 | Formin-like 3                      | 2.46 | Glycine-rich protein       | 32225  | 23292  | 110 | 5.69 | 8.22 |
| <i>Kalanchoe fedtschenkoi</i>     | 45190  | 563.28  | Unknown              | 3.16 | Unknown                    | 12.98 | Unknown                            | 2.88 | Unknown                    | 25024  | 20062  | 104 | 5.64 | 8.37 |
| <i>Kalanchoe laxiflora</i>        | 69177  | 619.54  | Unknown              | 3.01 | Unknown                    | 12.47 | Unknown                            | 3.09 | Unknown                    | 39148  | 29888  | 141 | 5.66 | 8.32 |
| <i>Klebsormidium nitens</i>       | 16282  | 813.31  | Unknown              | ***  | ***                        | 12.83 | Ser/Thr Prot Kin                   | 3.09 | Unknown                    | 9751   | 6500   | 31  | 5.57 | 8.39 |
| <i>Lactuca sativa</i>             | 45242  | 609.98  | Misin                | 3.16 | Cyt b6/f VIII              | 12.44 | Glh-2-like                         | 2.56 | Ctenidin-3-like            | 25604  | 19492  | 146 | 5.67 | 8.20 |
| <i>Linum usitatissimum</i>        | 43484  | 544.30  | Unknown              | 4.95 | Unknown                    | 12.41 | Unknown                            | 2.49 | Unknown                    | 24926  | 18459  | 99  | 5.58 | 8.34 |
| <i>Lupinus angustifolius</i>      | 52821  | 619.31  | Misin                | 5.59 | Arabinogalactan peptide 23 | 13.07 | Collagen $\alpha$ -2(V) chain-like | 2.76 | Glutamic acid rich protein | 31045  | 21650  | 126 | 5.67 | 8.21 |
| <i>Macleaya cordata</i>           | 21911  | 624.74  | Von Willbrand factor | 3.87 | Unknown                    | 12.32 | Unknown                            | 2.94 | Unknown                    | 12657  | 9206   | 48  | 5.61 | 8.29 |
| <i>Malus domestica</i>            | 60544  | 551.44  | Auxin TP BIG         | 3.45 | Unknown                    | 12.91 | CDPK                               | 2.79 | IFF6-like                  | 34853  | 25548  | 143 | 5.65 | 8.25 |
| <i>Manihot acuminata</i>          | 36528  | 516.85  | Unknown              | 1.01 | Unknown                    | 12.88 | Unknown                            | 2.88 | Unknown                    | 18516  | 17936  | 76  | 5.64 | 8.58 |
| <i>Manihot esculenta</i>          | 43286  | 621.75  | Midasin              | 3.16 | Cyt b6/f VIII              | 12.19 | SR45-like                          | 2.65 | ASF1-like                  | 25698  | 17491  | 97  | 5.68 | 8.18 |

|                                  |       |         |              |      |                     |       |                   |      |                                 |       |       |     |      |      |
|----------------------------------|-------|---------|--------------|------|---------------------|-------|-------------------|------|---------------------------------|-------|-------|-----|------|------|
| <i>Marchantia polymorpha</i>     | 17956 | 806.12  | Unknown      | 7.02 | Unknown             | 12.10 | Unknown           | 3.10 | Unknown                         | 10142 | 7793  | 21  | 5.54 | 8.48 |
| <i>Medicago truncatula</i>       | 57661 | 611.94  | Misin        | 1.90 | NCR peptide         | 12.74 | Unknown           | 2.57 | LEA                             | 30526 | 27027 | 108 | 5.61 | 8.40 |
| <i>Micromonas commoda</i>        | 10137 | 1532.91 | PKS          | 2.78 | Antisense noncoding | 12.61 | Unknown           | 2.95 | Unknown                         | 6417  | 3703  | 17  | 5.4  | 8.61 |
| <i>Micromonas pusilla</i>        | 10242 | 848.29  | Unknown      | 5.07 | Unknown             | 13.37 | Unknown           | 2.80 | Unknown                         | 5985  | 4242  | 15  | 5.37 | 8.97 |
| <i>Miscanthus sinensis</i>       | 89486 | 615.13  | Unknown      | 2.90 | Unknown             | 13.27 | Unknown           | 2.88 | Unknown                         | 45710 | 43546 | 230 | 5.65 | 8.76 |
| <i>Momordica charantia</i>       | 28666 | 616.95  | Misin        | 4.21 | DDG 4A              | 12.22 | 60S RP L39        | 3.16 | Small acidic protein 1          | 16621 | 11997 | 48  | 5.69 | 8.20 |
| <i>Monoraphidium neglectum</i>   | 16755 | 730.02  | Misin        | 4.12 | Unknown             | 13.01 | Unknown           | 2.79 | Unknown                         | 8940  | 7783  | 32  | 5.44 | 8.91 |
| <i>Morus notabilis</i>           | 26965 | 566.71  | Auxin TP BIG | 5.11 | Unknown             | 12.32 | Unknown           | 3.10 | Unknown                         | 13932 | 12984 | 49  | 5.60 | 8.55 |
| <i>Musa acuminata</i>            | 47707 | 616.23  | Misin        | 3.79 | DGG 4A              | 12.44 | Unknown           | 3.09 | TUB8                            | 27400 | 20184 | 123 | 5.69 | 8.28 |
| <i>Nelumbo nucifera</i>          | 38191 | 797.88  | Titin        | 3.16 | Cyt b6/f VIII       | 12.22 | 60S RP L39        | 2.95 | Prostatic spermine BP           | 22308 | 15782 | 101 | 5.70 | 8.21 |
| <i>Nicotiana attenuate</i>       | 44491 | 616.08  | Misin        | 4.15 | DGG 4A              | 12.19 | SR45              | 2.99 | Unknown                         | 23898 | 20492 | 101 | 5.67 | 8.24 |
| <i>Nicotiana glauca</i>          | 48160 | 564.57  | Auxin TP BIG | 1.30 | Unknown             | 12.44 | Unknown           | 2.95 | Unknown                         | 26496 | 21565 | 99  | 5.66 | 8.25 |
| <i>Nicotiana tabacum</i>         | 84255 | 539.85  | Auxin TP BIG | 3.16 | Cyt b6/f VIII       | 12.44 | Unknown           | 2.86 | mRNA decay protein              | 46302 | 37768 | 185 | 5.65 | 8.24 |
| <i>Nicotiana tomentosiformis</i> | 48962 | 564.92  | Aux TP BIG   | 3.18 | Cyt b6/f VIII       | 12.25 | Cell wall protein | 3.09 | Arabinogalactan peptide 14-like | 27278 | 21567 | 117 | 5.67 | 8.22 |
| <i>Olea europaea</i>             | 58334 | 567.49  | Misin        | 3.16 | Cyt b6/f VIII       | 12.36 | Unknown           | 3.18 | Acidic protein 2-like           | 32519 | 25690 | 125 | 5.65 | 8.23 |
| <i>Oryza brachyantha</i>         | 26803 | 597.14  | Misin        | 5.73 | Unknown             | 12.44 | NFD6              | 3.03 | Prostatic spermine BP           | 16083 | 10659 | 61  | 5.64 | 8.30 |
| <i>Oryza sativa</i>              | 37358 | 567.80  | Unknown      | 3.22 | Unknown             | 12.64 | Unknown           | 2.65 | Unknown                         | 20560 | 16732 | 66  | 5.56 | 8.69 |
| <i>Ostreococcus lucimarinus</i>  | 7603  | 1994.71 | PKS          | 4.12 | Cysteine protein    | 12.36 | Unknown           | 2.85 | Unknown                         | 4879  | 2711  | 13  | 5.40 | 8.62 |
| <i>Ostreococcus tauri</i>        | 7766  | 1237.34 | Unknown      | 3.29 | Ycf12               | 12.32 | L39e              | 3.28 | SVC                             | 4732  | 3018  | 16  | 5.47 | 8.67 |
| <i>Panicum hallii</i>            | 49825 | 608.88  | Unknown      | 1.87 | Unknown             | 13.07 | Unknown           | 3.05 | Unknown                         | 24843 | 24878 | 104 | 5.68 | 8.79 |
| <i>Phalaenopsis equestris</i>    | 29894 | 568.40  | Auxin TP BIG | 3.20 | Cyt b6/f VIII       | 12.5  | 50S L34           | 2.75 | Unknown                         | 16701 | 13099 | 94  | 5.69 | 8.27 |
| <i>Phaseolus vulgaris</i>        | 32720 | 617.41  | Unknown      | ***  | ***                 | 12.74 | Unknown           | 3.09 | Unknown                         | 18577 | 14073 | 70  | 5.68 | 8.29 |
| <i>Phoenix dactylifera</i>       | 38570 | 617.67  | Misin        | 3.19 | Cyt b6/f            | 12.45 | 60S RP L39        | 3.31 | PPCD VHS3-like                  | 22015 | 16450 | 105 | 5.67 | 8.31 |

|                                   |       |         |         |      |               |       |                |      |                       |       |       |     |      |       |
|-----------------------------------|-------|---------|---------|------|---------------|-------|----------------|------|-----------------------|-------|-------|-----|------|-------|
| <i>Physcomitrella patens</i>      | 35934 | 553.40  | Unknown | 3.21 | Unknown       | 12.72 | Unknown        | 2.77 | Unknown               | 19655 | 16205 | 74  | 5.60 | 8.47  |
| <i>Populus deltoides</i>          | 57249 | 567.25  | Unknown | 3.14 | Unknown       | 12.54 | Unknown        | 2.85 | Unknown               | 31040 | 26084 | 125 | 5.64 | 8.37  |
| <i>Populus euphratica</i>         | 49760 | 619.99  | Misin   | 3.16 | Cyt b6/f      | 12.22 | 60S RP L39     | 3.02 | Calsequestrin -1-like | 29358 | 20278 | 124 | 5.68 | 8.19  |
| <i>Populust richocarpa</i>        | 45942 | 603.68  | Misin   | ***  | ***           | 12.74 | Unknown        | 2.54 | Unknown               | 25431 | 20413 | 98  | 5.62 | 8.35  |
| <i>Porphyra umbilicalis</i>       | 13360 | 480.60  | Unknown | 3.18 | Cyt b6/f      | 13.33 | Unknown        | 2.6  | Unknown               | 3982  | 9365  | 13  | 5.47 | 10.40 |
| <i>Prunus avium</i>               | 35009 | 607.05  | Misin   | 3.84 | Unknown       | 12.22 | SR45           | 2.86 | Unknown               | 20962 | 13972 | 75  | 5.68 | 8.18  |
| <i>Prunus mume</i>                | 29705 | 678.34  | Unknown | 3.19 | Cyt b6/f VIII | 12.22 | 60S RP L39     | 2.54 | Cell wall protein gp1 | 17588 | 12054 | 63  | 5.68 | 8.21  |
| <i>Prunus persica</i>             | 32595 | 607.17  | Misin   | 3.19 | Cyt b6/f VIII | 12.22 | SR45           | 2.98 | SCP SP60-like         | 19315 | 13201 | 79  | 5.70 | 8.18  |
| <i>Punica granatum</i>            | 50476 | 1150.02 | Unknown | 1.21 | Unknown       | 13.96 | Unknown        | 2.07 | Unknown               | 23078 | 27314 | 84  | 5.52 | 8.93  |
| <i>Pyrus bretschneideri</i>       | 47086 | 1269.42 | Unknown | 4.13 | Unknown       | 12.23 | 50S RP L34     | 3.10 | Unknown               | 27610 | 19365 | 111 | 5.67 | 8.25  |
| <i>Raphanus sativus</i>           | 61216 | 607.96  | Misin   | 2.89 | Unknown       | 12.58 | IQ domain 31   | 2.79 | Shematrin-like 2      | 34204 | 26871 | 141 | 5.61 | 8.30  |
| <i>Ricinus communis</i>           | 27998 | 619.84  | Misin   | 3.16 | Cyt b6/f VIII | 12.47 | Unknown        | 3.12 | Small acidic protein  | 16138 | 11789 | 71  | 5.68 | 8.21  |
| <i>Salix purpurea</i>             | 61520 | 621.82  | Unknown | 3.26 | Unknown       | 12.61 | Unknown        | 2.77 | Unknown               | 35045 | 26358 | 117 | 5.64 | 8.29  |
| <i>Selaginella moellendorffii</i> | 34746 | 909.93  | Unknown | 5.18 | Unknown       | 12.45 | Unknown        | 3.28 | Unknown               | 20404 | 14243 | 99  | 5.66 | 8.27  |
| <i>Sesamum indicum</i>            | 35410 | 614.62  | Misin   | 3.16 | Cyt b6/f VIII | 12.64 | L32            | 2.88 | BCP1-like             | 20353 | 14974 | 83  | 5.68 | 8.21  |
| <i>Setaria italica</i>            | 35844 | 608.65  | Misin   | 3.16 | Cyt b6/f VIII | 12.44 | NFD6           | 3.13 | Prostatic spermine BP | 20727 | 15027 | 90  | 5.7  | 8.36  |
| <i>Solanum lycopersicum</i>       | 36008 | 620.33  | Misin   | 3.16 | Cyt b6/f VIII | 12.29 | SR45           | 2.46 | Cell wall protein     | 21001 | 14925 | 82  | 5.67 | 8.20  |
| <i>Solanum pennellii</i>          | 35068 | 620.19  | Misin   | 3.66 | Unknown       | 12.16 | SR45           | 2.20 | Myb-like              | 19944 | 15043 | 81  | 5.67 | 8.20  |
| <i>Solanum tuberosum</i>          | 37960 | 618.76  | Misin   | 3.16 | Cyt b6/f VIII | 13.24 | Extension-like | 2.95 | Tripartite motif 44   | 22261 | 15614 | 85  | 5.67 | 8.19  |
| <i>Sorghum bicolor</i>            | 39248 | 615.07  | Misin   | 3.16 | Cyt b6/f VIII | 12.57 | Unknown        | 3.00 | Unknown               | 21947 | 17200 | 101 | 5.68 | 8.43  |
| <i>Sphagnum fallax</i>            | 32298 | 1027.64 | Unknown | 3.19 | Unknown       | 12.19 | Unknown        | 2.62 | Unknown               | 19972 | 12256 | 70  | 5.61 | 8.32  |
| <i>Spinacia oleracea</i>          | 32794 | 615.44  | Misin   | 2.50 | SpolCp151     | 12.42 | EPR1           | 2.56 | Unknown               | 18350 | 14357 | 87  | 5.66 | 8.20  |
| <i>Spirodela polyrhiza</i>        | 19623 | 596.16  | Unknown | 3.16 | Cyt b6/f VIII | 12.69 | Unknown        | 2.74 | Unknown               | 10680 | 8903  | 40  | 5.60 | 8.52  |
| <i>Tarenaya hassleriana</i>       | 41094 | 614.85  | Midasin | 4.03 | Unknown       | 12.41 | IQ-domain 14   | 3.04 | Unknown               | 23230 | 17762 | 102 | 5.65 | 8.28  |

|                               |          |         |                |      |               |       |               |      |                      |       |          |       |      |      |
|-------------------------------|----------|---------|----------------|------|---------------|-------|---------------|------|----------------------|-------|----------|-------|------|------|
| <i>Theobroma cacao</i>        | 30854    | 621.12  | Midasin        | 3.16 | Cyt b6/f VIII | 12.21 | SR45          | 3.12 | Small acidic protein | 17897 | 12869    | 88    | 5.70 | 8.20 |
| <i>Trifolium pratense</i>     | 63799    | 566.60  | Auxin TP BIG   | ***  | ***           | 12.88 | Unknown       | 2.34 | Unknown              | 37487 | 26211    | 101   | 5.36 | 8.45 |
| <i>Trifolium subterraneum</i> | 42059    | 571.83  | Unknown        | ***  | ***           | 12.33 | Unknown       | 2.6  | Unknown              | 24271 | 17701    | 87    | 5.28 | 8.28 |
| <i>Triticum aestivum</i>      | 250      | 230.08  | Unknown        | 6.54 | Unknown       | 12.15 | Unknown       | 3.75 | Unknown              | 147   | 103      | 0     | 5.59 | 8.22 |
| <i>Triticum urartu</i>        | 24169    | 559.02  | UBR4           | 4.5  | Unknown       | 13.27 | Unknown       | 2.96 | Unknown              | 13783 | 10339    | 47    | 5.56 | 8.51 |
| <i>Vigna angularis</i>        | 37769    | 621.26  | Midasin        | 2.96 | Unknown       | 12.22 | 50S RP L34    | 2.81 | Clumping factor A    | 21862 | 15798    | 109   | 5.7  | 8.21 |
| <i>Vigna radiata</i>          | 42284    | 624.61  | Midasin        | 3.16 | Cyt b6/f VIII | 12.41 | Formin-like 6 | 2.89 | ATF7IP               | 24545 | 17654    | 83    | 5.69 | 8.21 |
| <i>Vigna unguiculata</i>      | 42287    | 616.90  | Unknown        | 3.17 | Cyt b6/f VIII | 12.91 | Unknown       | 2.95 | Unknown              | 24082 | 18103    | 102   | 5.69 | 8.35 |
| <i>Vitis vinifera</i>         | 41208    | 622.14  | Midasin        | 3.16 | Cyt b6/f VIII | 12.19 | Orf19         | 3.23 | Circumsporozite      | 25295 | 15837    | 76    | 5.70 | 8.19 |
| <i>Volvox carteri</i>         | 14436    | 2236.80 | Putative PKS I | 4.89 | Unknown       | 13.79 | Unknown       | 2.42 | Unknown              | 7560  | 6849     | 27    | 5.64 | 8.53 |
| <i>Zostera marina</i>         | 20450    | 606.86  | *****          | 1.68 | *****         | 12.75 | *****         | 2.42 | *****                | 10988 | 9417     | 45    | 5.61 | 8.36 |
| Average                       | 40469.47 | 707.23  |                |      |               | 12.62 |               |      |                      | 22820 | 17794.26 | 91.36 | 5.62 | 8.37 |

661

662

663 **Abbreviations:** PPCD VHS3-like: phosphopantothenoylcysteine decarboxylase subunit VHS3-like isoform X2, 60S RP L41: 60S ribosomal protein  
664 subunit L41, DDHGT 4A: Dolichyl-diphosphooligosaccharideprotein glycosyltransferase subunit 4A, PERK2: proline-rich receptor-like protein  
665 kinase PERK2, RNA Pol. II Med 17: mediator of RNA polymerase II subunit 17, FS CAYBR BP: fibrous sheath CABYR-binding protein-like,  
666 PKS: polyketide synthase, PS-I RC N: photosystem I reaction center subunit N, chloroplastic, partial; RPB1: DNA-directed RNA polymerase II  
667 subunit RPB1-like isoform X3, GRCW protein: glycine-rich cell wall structural protein, SR45: serine/arginine-rich splicing factor SR45-like,  
668 IMP:inosine-5'-monophosphate cyclohydrolase, ZRF: zinc ring finger-type, CWP:cell wall protein, DDGT: dolichyl-  
669 diphosphooligosaccharideprotein glycosyltransferase subunit 4A, PKDP: polycystic kidney disease protein 1-like 3, CSF: cleavage stimulation  
670 factor subunit 2 tau variant-like, AAPT: aminoalcoholphosphotransferase, RBP: RNA binding protein, SARMP: serine/arginine repetitive matrix  
671 protein 2-like, ER TF: ethylene responsive transcription factor, CDPK: cyclin-dependent serine/threonine-protein kinase, LEA: late embryogenesis  
672 associated protein, DDG: dolichyl-diphosphooligosaccharideprotein glycosyltransferase subunit 4A, NFD: nuclear fusion defective, SVC: satellite  
673 virus coat protein, PPCD: phosphopantothenoylcysteine decarboxylase, SCP: spore coat protein, ATF7IP: activating transcription factor 7-  
674 interacting protein 1.

**Table 2**

Abundance of various amino acids in different species. The second column represents the average abundance whereas the third and fourth column represent variation (high and low) in amino acid composition in different species from the average.

| Amino Acids | Average abundance (%) | High Abundance (%)                                                                                                                                                                                                                                                                                                                                                                                                                                                                                                                                                                                                                                                                                                                                                                                   | Low Abundance (%)                                                                                                                                                                                                                                                                                                                             |
|-------------|-----------------------|------------------------------------------------------------------------------------------------------------------------------------------------------------------------------------------------------------------------------------------------------------------------------------------------------------------------------------------------------------------------------------------------------------------------------------------------------------------------------------------------------------------------------------------------------------------------------------------------------------------------------------------------------------------------------------------------------------------------------------------------------------------------------------------------------|-----------------------------------------------------------------------------------------------------------------------------------------------------------------------------------------------------------------------------------------------------------------------------------------------------------------------------------------------|
| Ala         | 7.68                  | <i>Porphyra umbilicalis</i> (17.58),<br><i>Monoraphidium neglectum</i> (16.58),<br><i>Gonium pectorale</i> (15.45),<br><i>Chlorella variabilis</i> (15.15),<br><i>Chlamydomonas reinhardtii</i> (14.57),<br><i>Micromonas pusilla</i> (14.20),<br><i>Auxenochlorella protothecoides</i> (13.69),<br><i>Volvox carteri</i> (13.29),<br><i>Helicosporidium</i> sp. (12.75),<br><i>Micromonas commoda</i> (12.61),<br><i>Coccomyxa subellipsoidea</i> (12.29),<br><i>Ostreococcus lucimarinus</i> (11.89),<br><i>Chromochloris zofingiensis</i> (11.57),<br><i>Dunaliella salina</i> (11.53),<br><i>Ostreococcus tauri</i> (11.47),<br><i>Klebsormidium nitens</i> (10.62),<br><i>Botryococcus braunii</i> (9.86),<br><i>Dichanthelium oligosanthos</i> (9.71),<br><i>Chlamydomonas eustigma</i> (9.53) | <i>Picea glauca</i> (5.12),<br><i>Medicago truncatula</i> (5.8),<br><i>Lactuca sativa</i> (5.81),<br><i>Zostera marina</i> (5.86)                                                                                                                                                                                                             |
| Asp         | 5.32                  | <i>Micromonas pusilla</i> (6.68),<br><i>Micromonas commode</i> (6.46),<br><i>Ostreococcus lucimarinus</i> (6.38),<br><i>Ostreococcus tauri</i> (6.33),<br><i>Bathycoccus prasinos</i> (6.05)                                                                                                                                                                                                                                                                                                                                                                                                                                                                                                                                                                                                         | <i>Picea glauca</i> (3.46),<br><i>Dunaliella salina</i> (4.28),<br><i>Chlorella variabilis</i> (4.41),<br><i>Chlamydomonas reinhardtii</i> (4.61),<br><i>Porphyra umbilicalis</i> (4.63),<br><i>Volvox carteri</i> (4.71),<br><i>Monoraphidium neglectum</i> (4.71),<br><i>Botryococcus braunii</i> (4.78),<br><i>Gonium pectorale</i> (4.78) |
| Glu         | 6.43                  | <i>Bathycoccus prasinos</i> (8.44),<br><i>Klebsormidium nitens</i> (7.2),                                                                                                                                                                                                                                                                                                                                                                                                                                                                                                                                                                                                                                                                                                                            | <i>Porphyra umbilicalis</i> (3.52),<br><i>Picea glauca</i>                                                                                                                                                                                                                                                                                    |

|     |      |                                                                                                                                                                                                                                                                                                                                                                                                                                                                                                                                                           |                                                                                                                                                                                                                                                                                                                                                                                                                                                                              |
|-----|------|-----------------------------------------------------------------------------------------------------------------------------------------------------------------------------------------------------------------------------------------------------------------------------------------------------------------------------------------------------------------------------------------------------------------------------------------------------------------------------------------------------------------------------------------------------------|------------------------------------------------------------------------------------------------------------------------------------------------------------------------------------------------------------------------------------------------------------------------------------------------------------------------------------------------------------------------------------------------------------------------------------------------------------------------------|
|     |      | <i>Ostreococcus tauri</i> (7.18),<br><i>Ostreococcus lucimarinus</i> (7.03)                                                                                                                                                                                                                                                                                                                                                                                                                                                                               | (4.02), <i>Chromochloris</i><br><i>zofingiensis</i> (4.66),<br><i>Chlamydomonas</i><br><i>reinhardtii</i> (5.15),<br><i>Volvox carteri</i> (5.21),<br><i>Monoraphidium</i><br><i>neglectum</i> (5.35)                                                                                                                                                                                                                                                                        |
| Phe | 3.97 | <i>Arachis duranensis</i> (6.18)                                                                                                                                                                                                                                                                                                                                                                                                                                                                                                                          | <i>Porphyra umbilicalis</i><br>(2.01), <i>Gonium</i><br><i>pectorale</i> (2.4),<br><i>Monoraphidium</i><br><i>neglectum</i> (2.44),<br><i>Volvox carteri</i> (2.49),<br><i>Dunaliella salina</i><br>(2.56), <i>Chromochloris</i><br><i>zofingiensis</i> (2.58),<br><i>Chlamydomonas</i><br><i>reinhardtii</i> (2.59),<br><i>Chlorella variabilis</i><br>(2.68),<br><i>Chlamydomonas</i><br><i>eustigma</i> (2.89),<br><i>Auxenochlorella</i><br><i>protothecoides</i> (2.92) |
| Gly | 6.80 | <i>Porphyra umbilicalis</i> (11.76),<br><i>Monoraphidium neglectum</i> (10.51),<br><i>Gonium pectorale</i> (10.33),<br><i>Chlamydomonas reinhardtii</i> (9.58),<br><i>Volvox carteri</i> (9.54), <i>Chlorella</i><br><i>variabilis</i> (9.23), <i>Auxenochlorella</i><br><i>protothecoides</i> (8.82), <i>Micromonas</i><br><i>commoda</i> (8.81), <i>Micromonas</i><br><i>pusilla</i> (8.59), <i>Klebsormidium</i><br><i>nitens</i> (8.44), <i>Helicosporidium</i> sp.<br>(8.29), <i>Dunaliella salina</i> (8.11),<br><i>Botryococcus braunii</i> (8.03) | <i>Arachis duranensis</i><br>(4.19)                                                                                                                                                                                                                                                                                                                                                                                                                                          |
| His | 2.4  | <i>Dunaliella salina</i> (3.13)                                                                                                                                                                                                                                                                                                                                                                                                                                                                                                                           | <i>Bathycoccus prasinus</i><br>(1.87), <i>Ostreococcus</i><br><i>tauri</i> (1.93),<br><i>Monoraphidium</i><br><i>neglectum</i> (1.93),<br><i>Micromonas pusilla</i><br>(1.94), <i>Ostreococcus</i><br><i>lucimarinus</i> (1.96)                                                                                                                                                                                                                                              |

|     |      |                                    |                                                                                                                                                                                                                                                                                                                                                                                               |
|-----|------|------------------------------------|-----------------------------------------------------------------------------------------------------------------------------------------------------------------------------------------------------------------------------------------------------------------------------------------------------------------------------------------------------------------------------------------------|
| Ile | 4.94 | <i>Zostera marina</i> (6.09)       | <i>Porphyra umbilicalis</i> (1.77),<br><i>Monoraphidium neglectum</i> (2.34),<br><i>Gonium pectorale</i> (2.37), <i>Chlorella variabilis</i> (2.52),<br><i>Chlamydomonas reinhardtii</i> (2.60),<br><i>Volvox carteri</i> (2.78),<br><i>Helicosporidium</i> sp. (2.80), <i>Dunaliella salina</i> (2.82),<br><i>Auxenochlorella protothecoides</i> (2.96),<br><i>Micromonas pusilla</i> (2.98) |
| Lys | 5.73 | <i>Bathycoccus prasinos</i> (7.33) | <i>Porphyra umbilicalis</i> (2.08), <i>Gonium pectorale</i> (2.79),<br><i>Monoraphidium neglectum</i> (2.86),<br><i>Volvox carteri</i> (3.03),<br><i>Auxenochlorella protothecoides</i> (3.06),<br><i>Chlorella variabilis</i> (3.06),<br><i>Chlamydomonas reinhardtii</i> (3.07),<br><i>Helicosporidium</i> sp. (3.17), <i>Dunaliella salina</i> (3.39)                                      |
| Leu | 9.62 | <i>Picea glauca</i> (13.12)        | <i>Porphyra umbilicalis</i> (7.07), <i>Micromonas pusilla</i> (7.70),<br><i>Bathycoccus prasinos</i> (7.85), <i>Micromonas commoda</i> (7.98),<br><i>Ostreococcus tauri</i> (8.18), <i>Ostreococcus lucimarinus</i> (8.41)                                                                                                                                                                    |
| Met | 2.40 | <i>Picea glauca</i> (3.75)         | <i>Porphyra umbilicalis</i> (1.45),<br><i>Monoraphidium neglectum</i> (1.78),                                                                                                                                                                                                                                                                                                                 |

|     |      |                                                                                                                                                                                                                                                                                         |                                                                                                                                                                                                                                                                                                                                                                                                                                                                                                                                                                                                                                    |
|-----|------|-----------------------------------------------------------------------------------------------------------------------------------------------------------------------------------------------------------------------------------------------------------------------------------------|------------------------------------------------------------------------------------------------------------------------------------------------------------------------------------------------------------------------------------------------------------------------------------------------------------------------------------------------------------------------------------------------------------------------------------------------------------------------------------------------------------------------------------------------------------------------------------------------------------------------------------|
|     |      |                                                                                                                                                                                                                                                                                         | <i>Klebsormidium nitens</i> (1.84),<br><i>Auxenochlorella protothecoides</i> (1.95),<br><i>Gonium pectorale</i> (1.97), <i>Chlorella variabilis</i> (1.98),<br><i>Micromonas pusilla</i> (1.98),<br><i>Helicosporidium</i> sp. (1.99)                                                                                                                                                                                                                                                                                                                                                                                              |
| Asn | 4.13 | <i>Medicago truncatula</i> (5.09)                                                                                                                                                                                                                                                       | <i>Porphyra umbilicalis</i> (1.53),<br><i>Monoraphidium neglectum</i> (1.88),<br><i>Chlorella variabilis</i> (1.93),<br><i>Auxenochlorella protothecoides</i> (2.02),<br><i>Gonium pectorale</i> (2.11),<br><i>Helicosporidium</i> sp. (2.15),<br><i>Chlamydomonas reinhardtii</i> (2.38),<br><i>Micromonas pusilla</i> (2.49), <i>Volvox carteri</i> (2.49), <i>Dunaliella salina</i> (2.61),<br><i>Micromonas commoda</i> (2.71), <i>Coccomyxa subellipsoidea</i> (2.75),<br><i>Klebsormidium nitens</i> (2.82), <i>Botryococcus braunii</i> (2.89),<br><i>Ostreococcus tauri</i> (2.93), <i>Ostreococcus lucimarinus</i> (2.99) |
| Pro | 5.10 | <i>Porphyra umbilicalis</i> (9.2),<br><i>Botryococcus braunii</i> (7.10),<br><i>Dunaliella salina</i> (7.08), <i>Volvox carteri</i> (7.00), <i>Gonium pectorale</i> (6.85), <i>Chlamydomonas reinhardtii</i> (6.49), <i>Picea glauca</i> (6.45),<br><i>Chlorella variabilis</i> (6.41), | <i>Bathycoccus prasinos</i> (3.81)                                                                                                                                                                                                                                                                                                                                                                                                                                                                                                                                                                                                 |

|     |      |                                                                                                                                                                                                                                                                                                                                                                                                                                                                                                                                             |                                                                                                                                                                                                                                                                                                                                                                                                                                         |
|-----|------|---------------------------------------------------------------------------------------------------------------------------------------------------------------------------------------------------------------------------------------------------------------------------------------------------------------------------------------------------------------------------------------------------------------------------------------------------------------------------------------------------------------------------------------------|-----------------------------------------------------------------------------------------------------------------------------------------------------------------------------------------------------------------------------------------------------------------------------------------------------------------------------------------------------------------------------------------------------------------------------------------|
|     |      | <i>Monoraphidium neglectum</i> (6.40),<br><i>Auxenochlorella protothecoides</i><br>(6.25), <i>Klebsormidium nitens</i> (6.11)                                                                                                                                                                                                                                                                                                                                                                                                               |                                                                                                                                                                                                                                                                                                                                                                                                                                         |
| Gln | 3.74 | <i>Dunaliella salina</i> (7.00),<br><i>Chromochloris zofingiensis</i> (6.20),<br><i>Monoraphidium neglectum</i> (5.60),<br><i>Chlorella variabilis</i> (5.56),<br><i>Chlamydomonas eustigma</i> (4.83),<br><i>Sphagnum fallax</i> (4.67), <i>Coccomyxa</i><br><i>subellipsoidea</i> (4.59), <i>Volvox</i><br><i>carteri</i> (4.46), <i>Botryococcus braunii</i><br>(4.35), <i>Chlamydomonas reinhardtii</i><br>(4.28), <i>Physcomitrella patens</i><br>(4.08), <i>Doroceras hygrometricum</i><br>(4.04), <i>Klebsormidium nitens</i> (4.03) | <i>Porphyra umbilicalis</i><br>(2.04), <i>Micromonas</i><br><i>pusilla</i> (2.06),<br><i>Micromonas commoda</i><br>(2.58), <i>Ostreococcus</i><br><i>tauri</i> (2.58),<br><i>Ostreococcus</i><br><i>lucimarinus</i> (2.64)                                                                                                                                                                                                              |
| Arg | 5.68 | <i>Porphyra umbilicalis</i> (9.81),<br><i>Micromonas pusilla</i> (8.12),<br><i>Ostreococcus tauri</i> (7.96),<br><i>Helicosporidium</i> sp. (7.74),<br><i>Micromonas commoda</i> (7.65),<br><i>Ostreococcus lucimarinus</i> (7.46),<br><i>Auxenochlorella protothecoides</i><br>(7.13)                                                                                                                                                                                                                                                      | <i>Medicago truncatula</i><br>(4.84), <i>Trifolium</i><br><i>pratense</i> (4.95), <i>Cicer</i><br><i>arietinum</i> (4.97),<br><i>Lactuca sativa</i> (4.99)                                                                                                                                                                                                                                                                              |
| Ser | 8.71 | <i>Chlamydomonas eustigma</i> (9.72)                                                                                                                                                                                                                                                                                                                                                                                                                                                                                                        | <i>Monoraphidium</i><br><i>neglectum</i> (6.33),<br><i>Chlorella variabilis</i><br>(6.44),<br><i>Auxenochlorella</i><br><i>protothecoides</i> (6.49),<br><i>Porphyra umbilicalis</i><br>(6.52), <i>Micromonas</i><br><i>commoda</i> (6.57),<br><i>Ostreococcus</i><br><i>lucimarinus</i> (6.72),<br><i>Micromonas pusilla</i><br>(6.74), <i>Gonium</i><br><i>pectorale</i> (7.06),<br><i>Chlamydomonas</i><br><i>reinhardtii</i> (7.11) |
| Thr | 4.90 | <i>Chromochloris zofingiensis</i> (5.80),<br><i>Ostreococcus tauri</i> (5.77),<br><i>Bathycoccus prasinos</i> (5.72),<br><i>Ostreococcus lucimarinus</i> (5.70),<br><i>Chlamydomonas eustigma</i> (5.44),                                                                                                                                                                                                                                                                                                                                   |                                                                                                                                                                                                                                                                                                                                                                                                                                         |

|                                                                                                       |      |                                                                                                                                                                                                                                    |                                                                |
|-------------------------------------------------------------------------------------------------------|------|------------------------------------------------------------------------------------------------------------------------------------------------------------------------------------------------------------------------------------|----------------------------------------------------------------|
| <hr/>                                                                                                 |      |                                                                                                                                                                                                                                    |                                                                |
| <i>Porphyra umbilicalis</i> (5.39),<br><i>Micromonas pusilla</i> (5.33), <i>Volvox carteri</i> (5.30) |      |                                                                                                                                                                                                                                    |                                                                |
| <hr/>                                                                                                 |      |                                                                                                                                                                                                                                    |                                                                |
| Val                                                                                                   | 6.55 | <i>Ostreococcus tauri</i> (7.42),<br><i>Ostreococcus lucimarinus</i> (7.35),<br><i>Porphyra umbilicalis</i> (7.32),<br><i>Micromonas commoda</i> (7.22),<br><i>Helicosporidium</i> sp. (7.20),<br><i>Micromonas pusilla</i> (7.11) | <i>Picea glauca</i> (5.26),<br><i>Dunaliella salina</i> (5.78) |
| <hr/>                                                                                                 |      |                                                                                                                                                                                                                                    |                                                                |

681  
682  
683  
684  
685  
686  
687  
688  
689  
690  
691  
692  
693  
694  
695  
696  
697  
698  
699  
700  
701  
702  
703  
704  
705  
706  
707  
708  
709  
710  
711  
712  
713  
714

**Table 3**

Average abundance of different amino acids in plant proteome. Leu was high abundant whereas Trp was the low abundant amino acid in the plant kingdom. The average amino acid composition includes 5.8 million protein sequences from 145 plant species.

| Biosynthetic pathways/Substrate             | Amino acids   | Average abundance (%) in Proteome |
|---------------------------------------------|---------------|-----------------------------------|
| $\alpha$ -Ketoglutarate                     | Arginine      | 6.68                              |
|                                             | Glutamate     | 6.43                              |
|                                             | Glutamine     | 3.74                              |
|                                             | Proline       | 5.10                              |
| Pyruvate                                    | Alanine       | 7.68                              |
|                                             | Isoleucine    | 4.94                              |
|                                             | Leucine       | 9.62                              |
|                                             | Valine        | 6.55                              |
| 3-Phosphoglycerate                          | Glycine       | 6.80                              |
|                                             | Cysteine      | 1.85                              |
|                                             | Serine        | 8.71                              |
| Oxaloacetate                                | Asparagine    | 4.13                              |
|                                             | Aspartate     | 5.32                              |
|                                             | Lysine        | 5.73                              |
|                                             | Methionine    | 2.40                              |
|                                             | Threonine     | 4.90                              |
| Phosphoenolpyruvate & Erythrose 4-phosphate | Phenylalanine | 3.97                              |
|                                             | Tryptophan    | 1.28                              |
|                                             | Tyrosine      | 2.67                              |
| Ribose 5-phosphate                          | Histidine     | 2.4                               |

## **Figure legends**

### **Figure 1**

Principal component analysis (PCA) of acidic *pI* proteins. The PCA plot illustrates the relationship between the acidic *pI* of bryophytes and monocot plants which exhibit a linear correlation relative to algae and eudicots.

### **Figure 2**

Principal component analysis (PCA) of basic *pI* proteins. The PCA plot illustrates that the basic *pI* of algae, bryophytes, eudicots, and monocot plants cluster distinctly from each other and that there is no lineage-specific correlation with basic *pI* proteins.

### **Figure 3**

Trimodal distribution of isoelectric points (*pI*) and the molecular mass (kDa) of plant proteins. The *pI* of plant proteins ranged from 1.99 (epsin) to 13.96 (hypothetical protein), while the molecular mass ranged from 0.54 (unknown) to 2236.8 (type I polyketide synthase) kDa. The X-axis represents the *pI* and the Y-axis represents the molecular mass of the proteins.

### **Figure 4**

Average amino acid composition of proteins in the plant kingdom. Leu is the most abundant while Trp is the least abundant. The amino acid, Sec, was only found in a few species of algae and was absent from all other species. Ambiguous amino acids were found in a few species as well.

### **Figure 5**

Principal component analysis (PCA) of amino acid abundance in plant proteomes. The PCA plot shows that Tyr, Trp, Cys, His, Met, and Xaa (unknown) amino acids are low-abundance and cluster together. The abundance of Leu, Ser, Ile, Lys, and Gln was higher and grouped together. The plot shows that the abundance of amino acids is lineage specific. Algae, eudicots, and monocot plants exhibit a lineage specific correlation.

## **Figure 6**

Schematic illustration of the biosynthetic pathway of amino acids. The abundance of aromatic ring containing amino acids is lower relative to other amino acids. The average abundance of the aromatic ring containing amino acid, Trp, is the lowest amongst others that are biosynthesized via phosphoenolpyruvate and erythrose 4-phosphate. Similarly, the abundance of Cys is relatively low compared to other amino acids. Ser is biosynthesized from 3-phosphoglycerate and Ser is subsequently used to produce Gly and Cys amino acids. The abundance of Cys is lower relative to Gly, suggesting the existence of allosteric feed-back inhibition of the biosynthesis of Cys by Ser.

## **Supplementary Data**

### **Supplementary File 1**

Supplementary file containing average amino acid composition of plant proteomes. The file is present in excel sheet and individual sheet represents details of different amino acid.

Figure 1

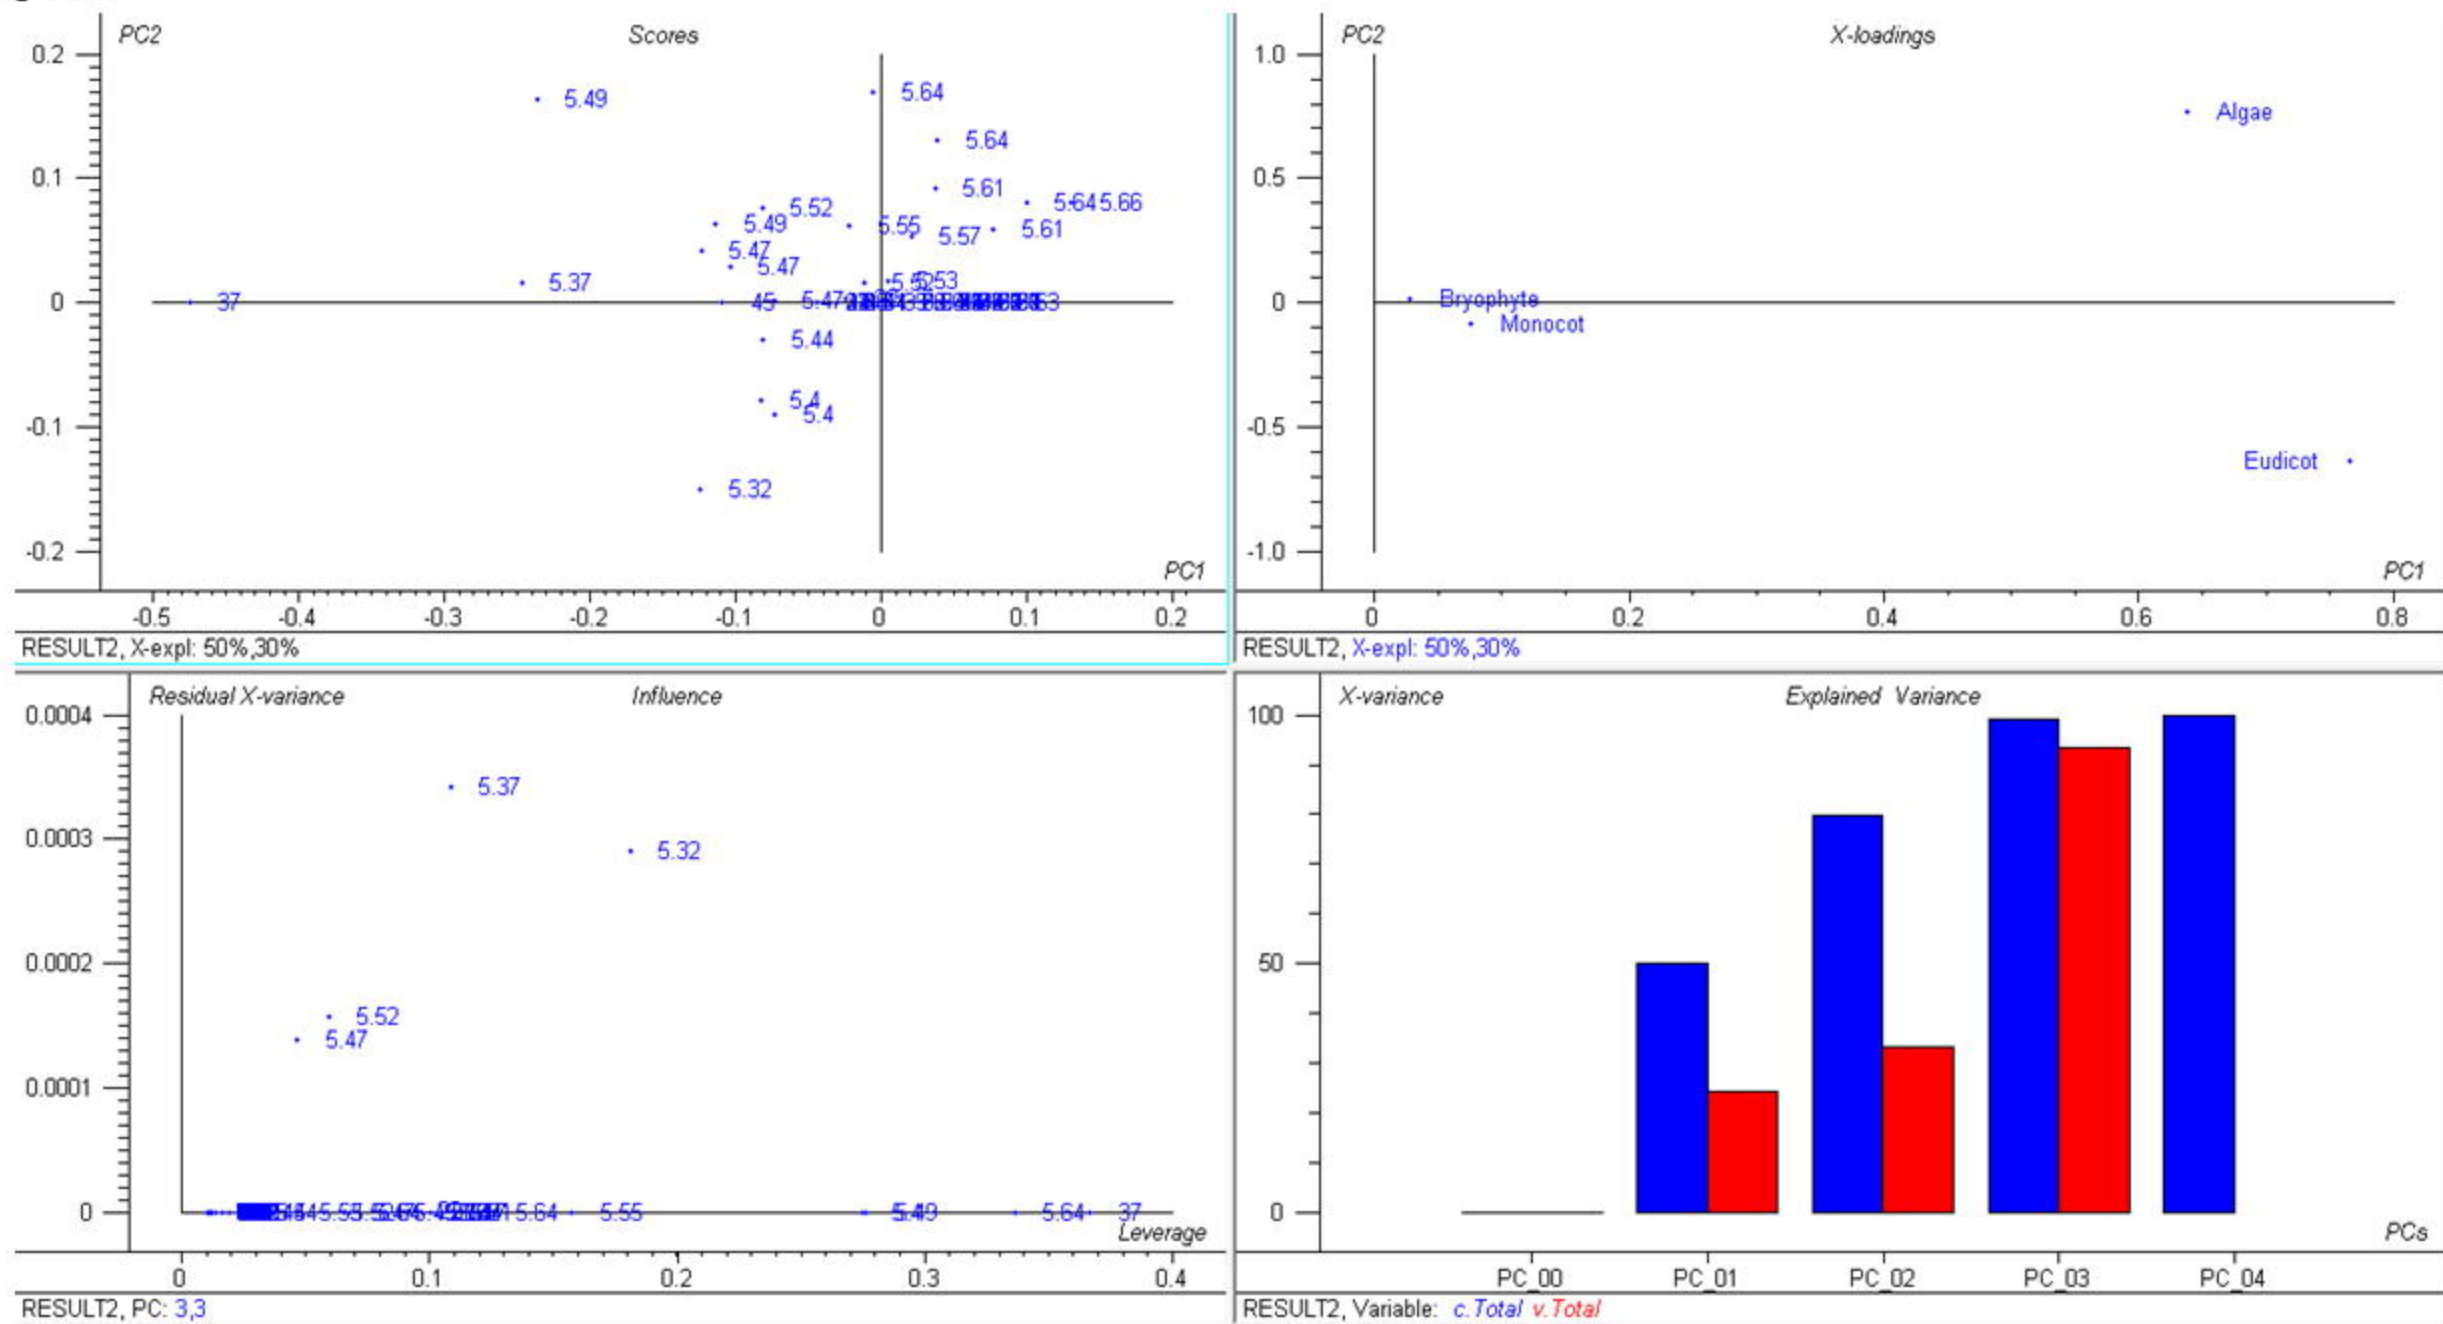

Figure 2

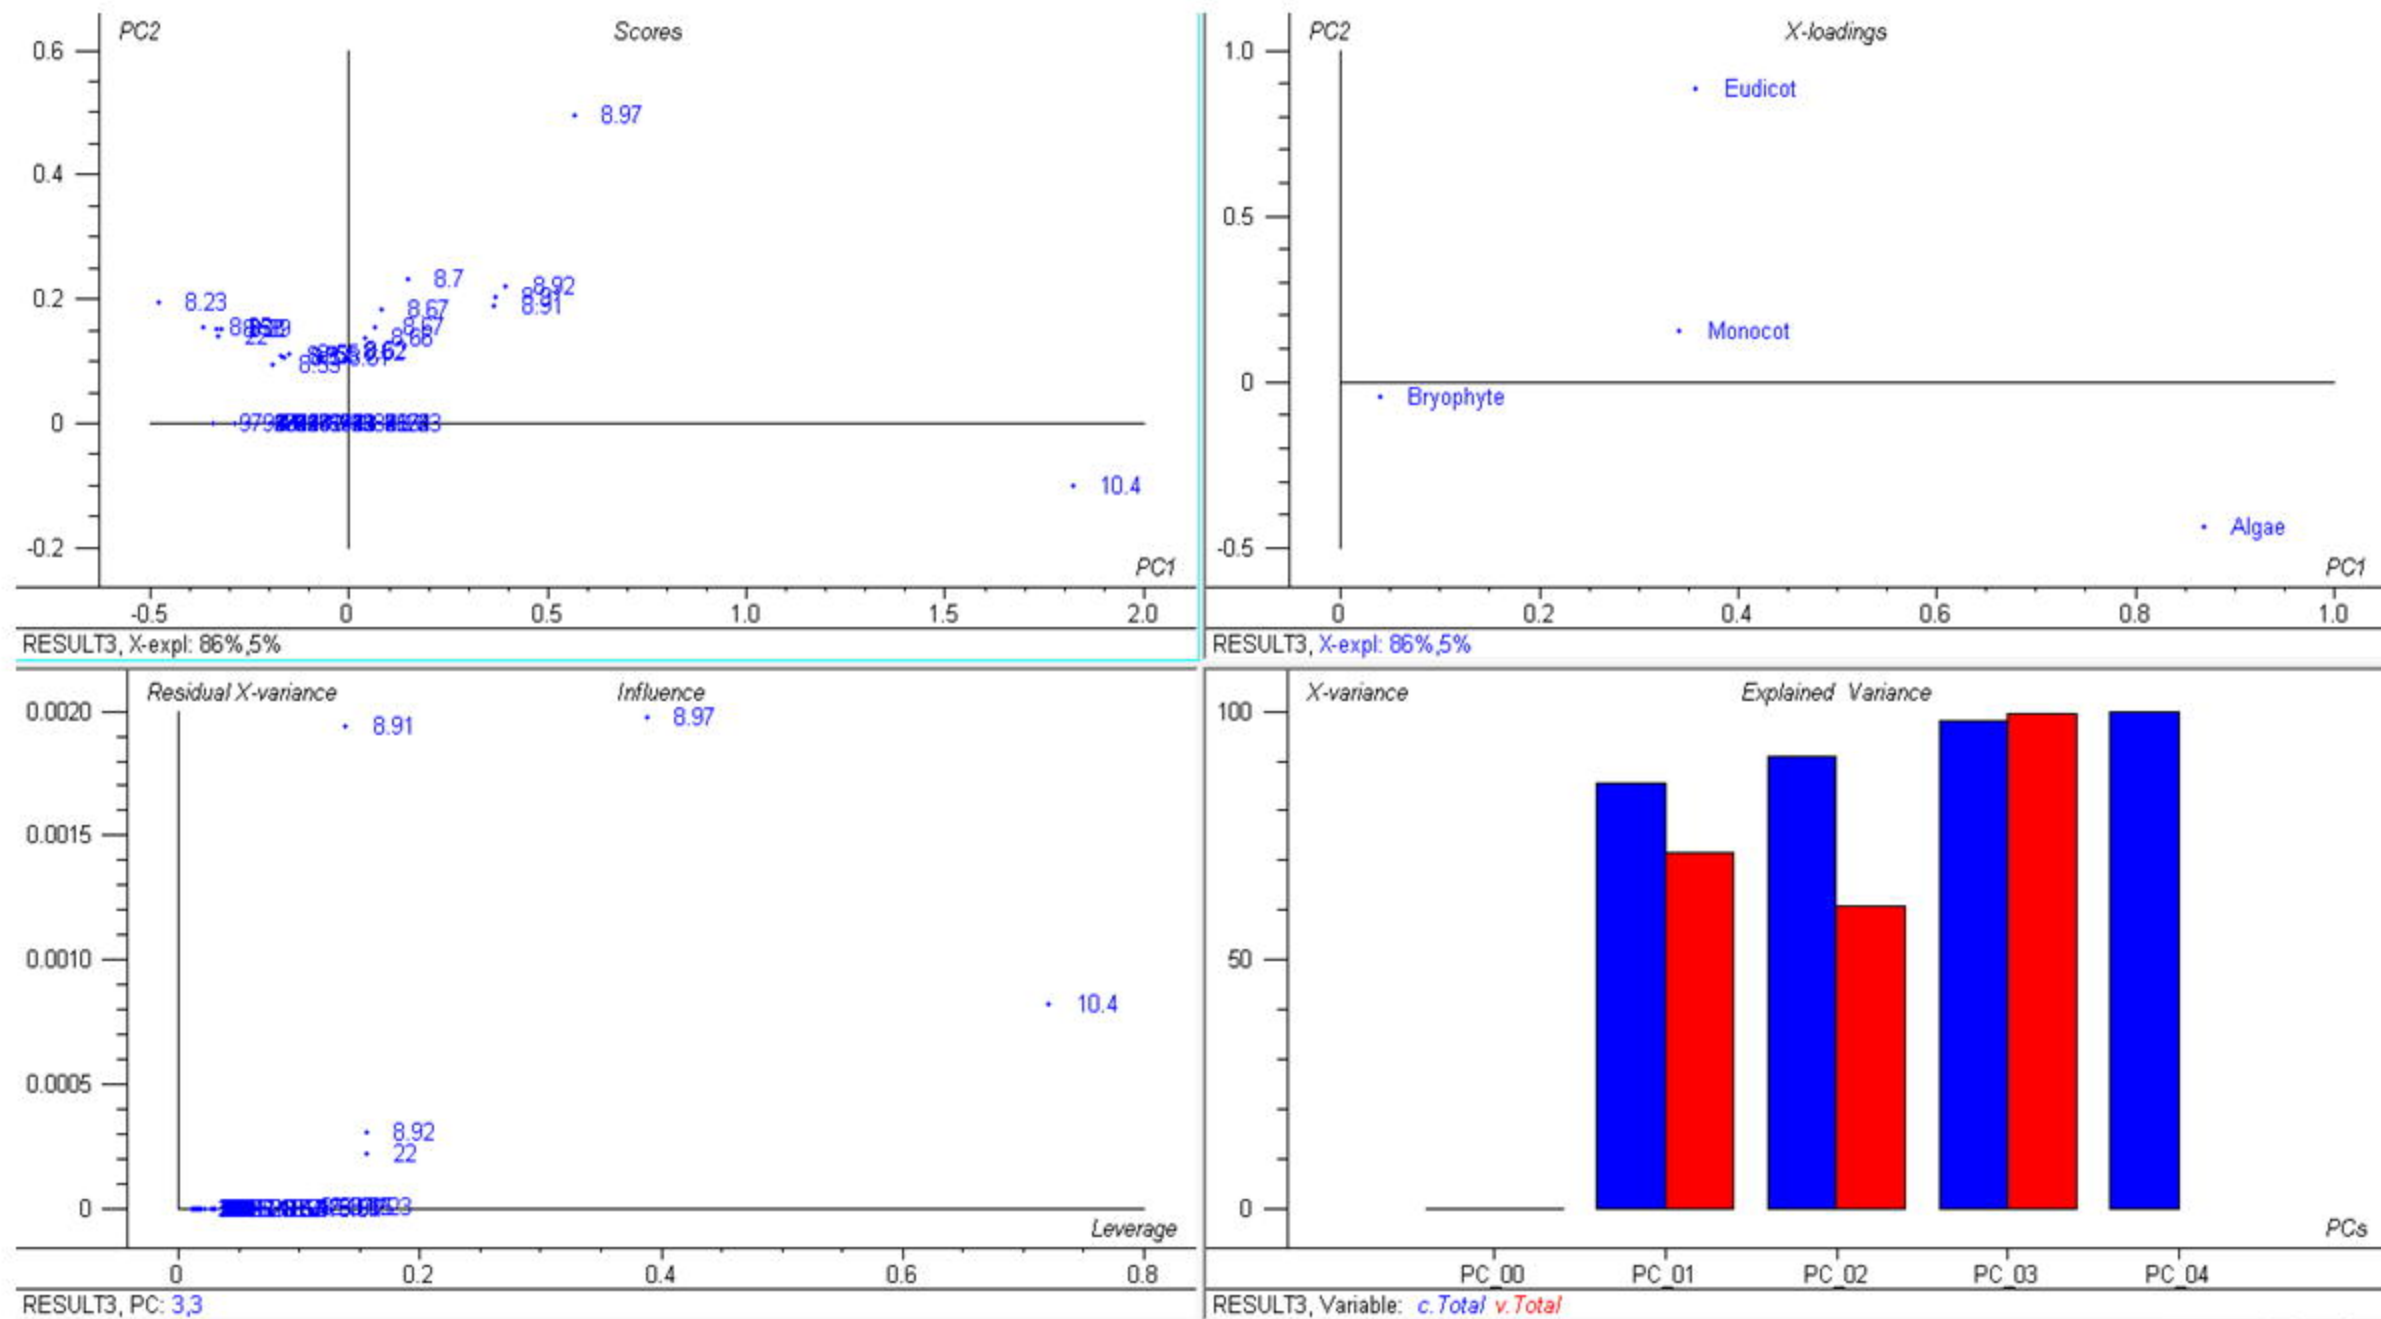

Figure 3

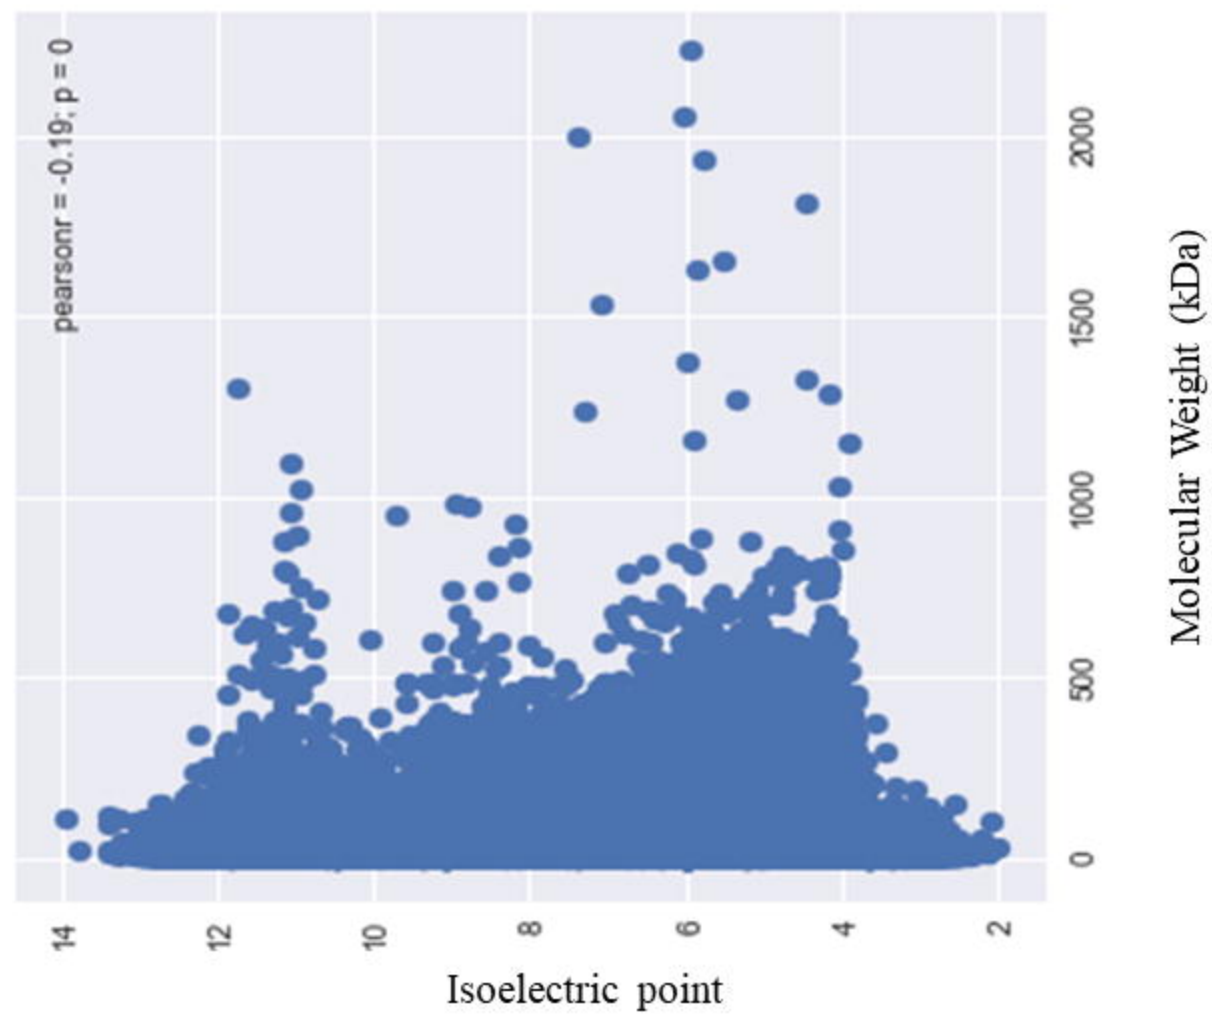

Figure 4

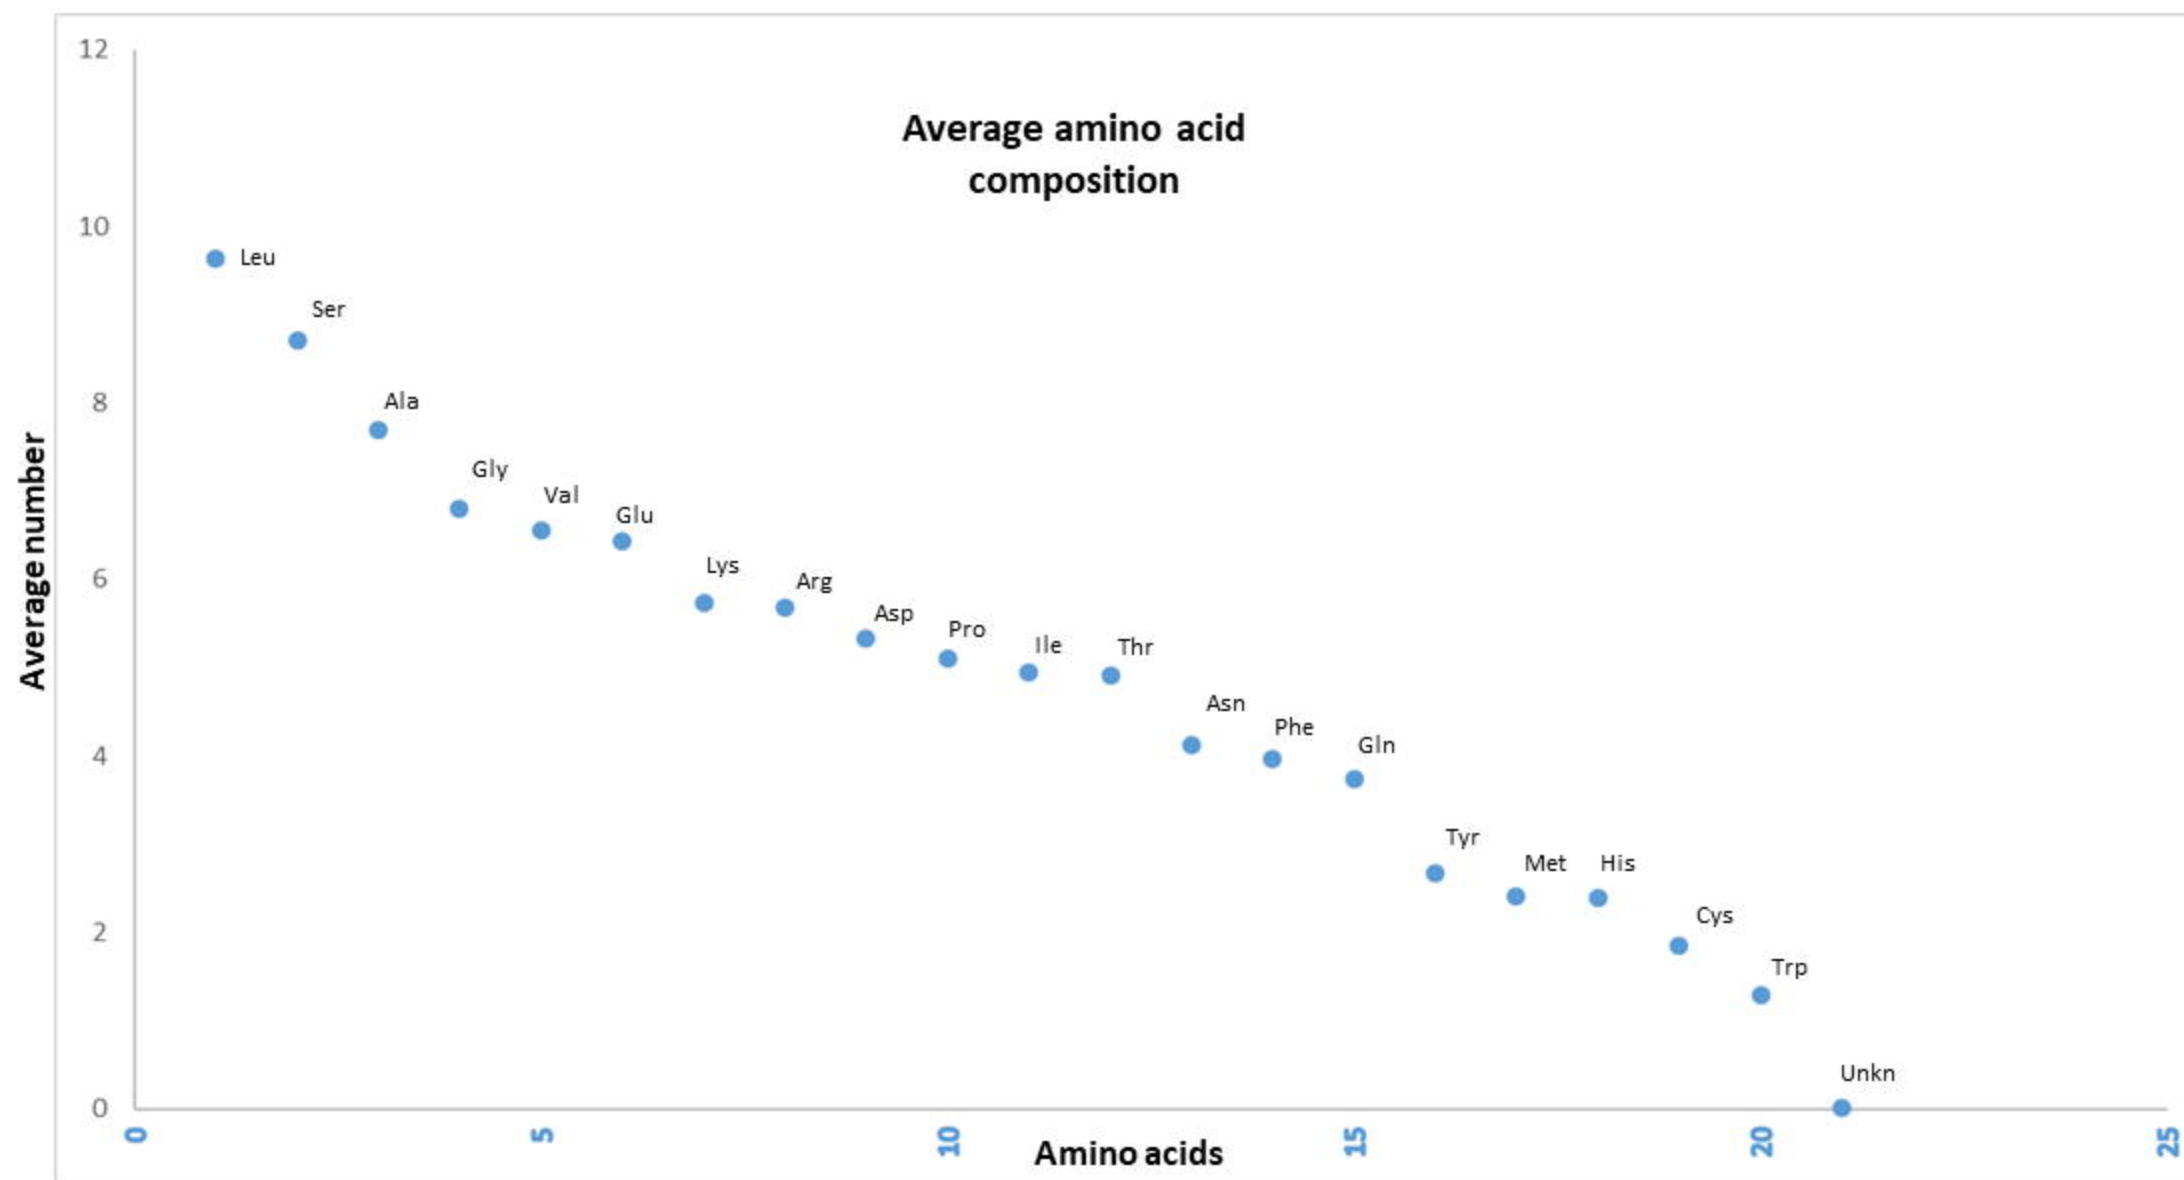

Figure 5

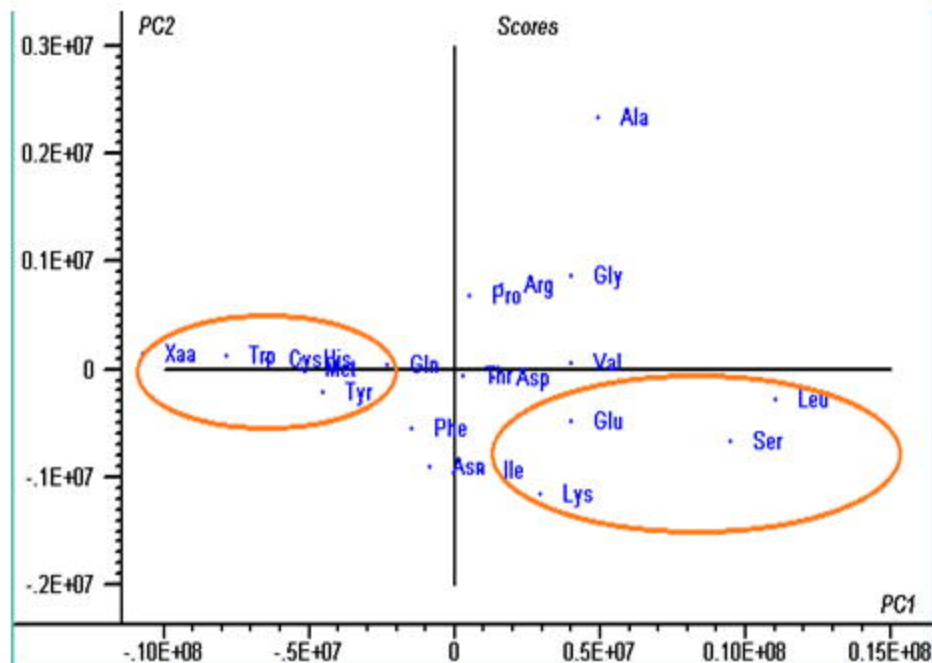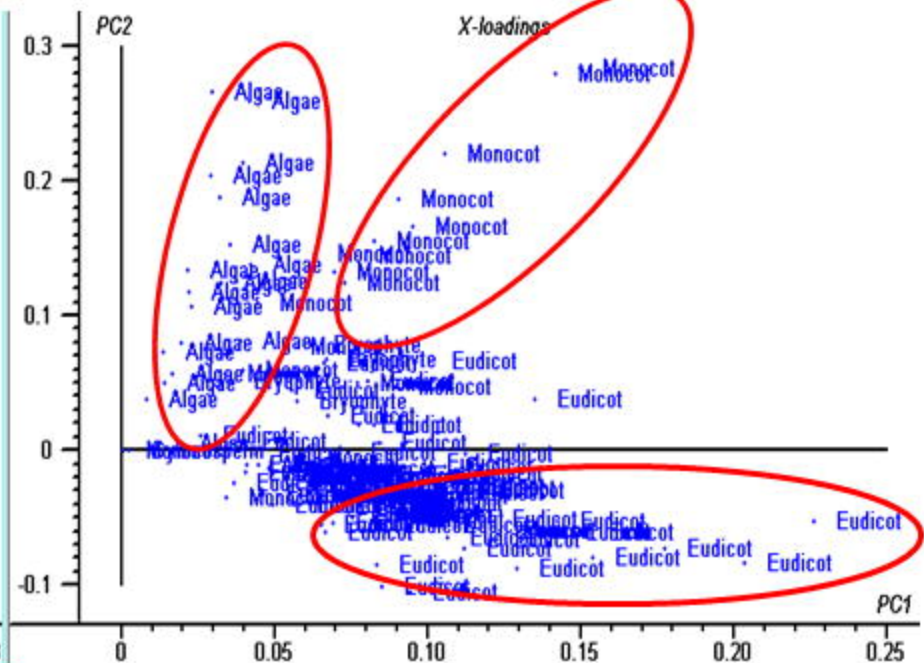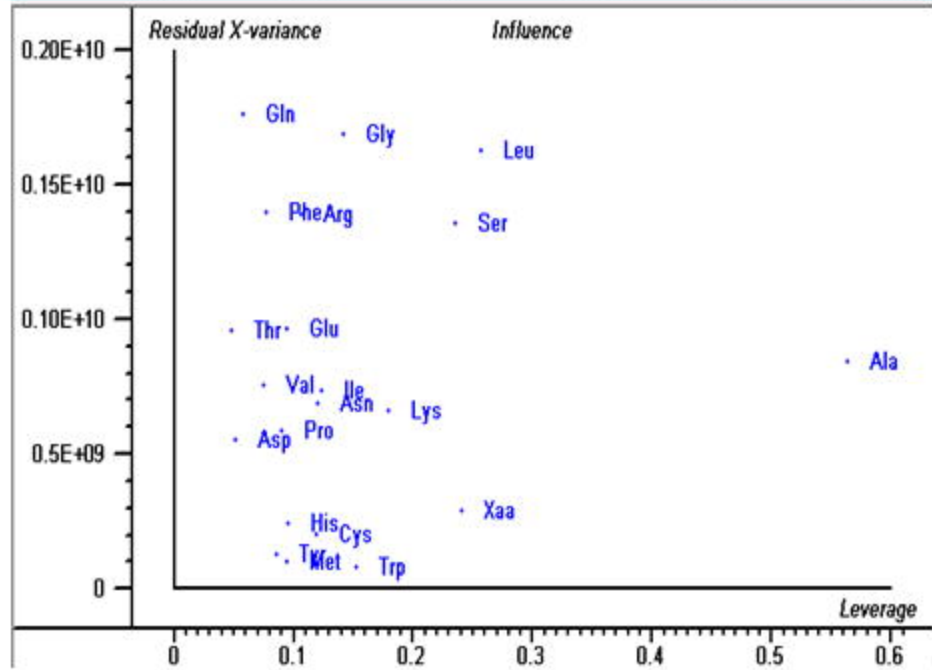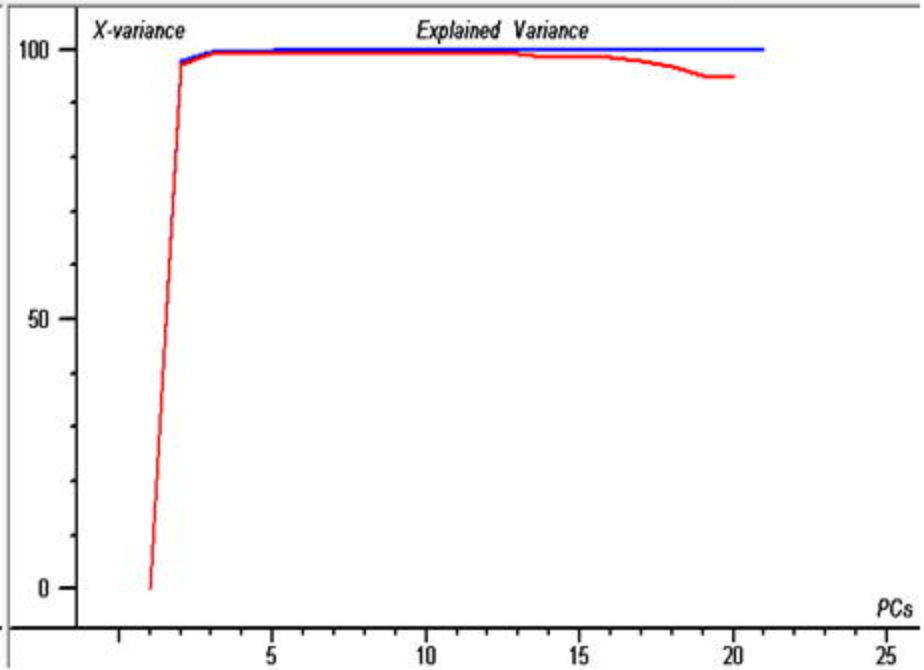

Figure 6

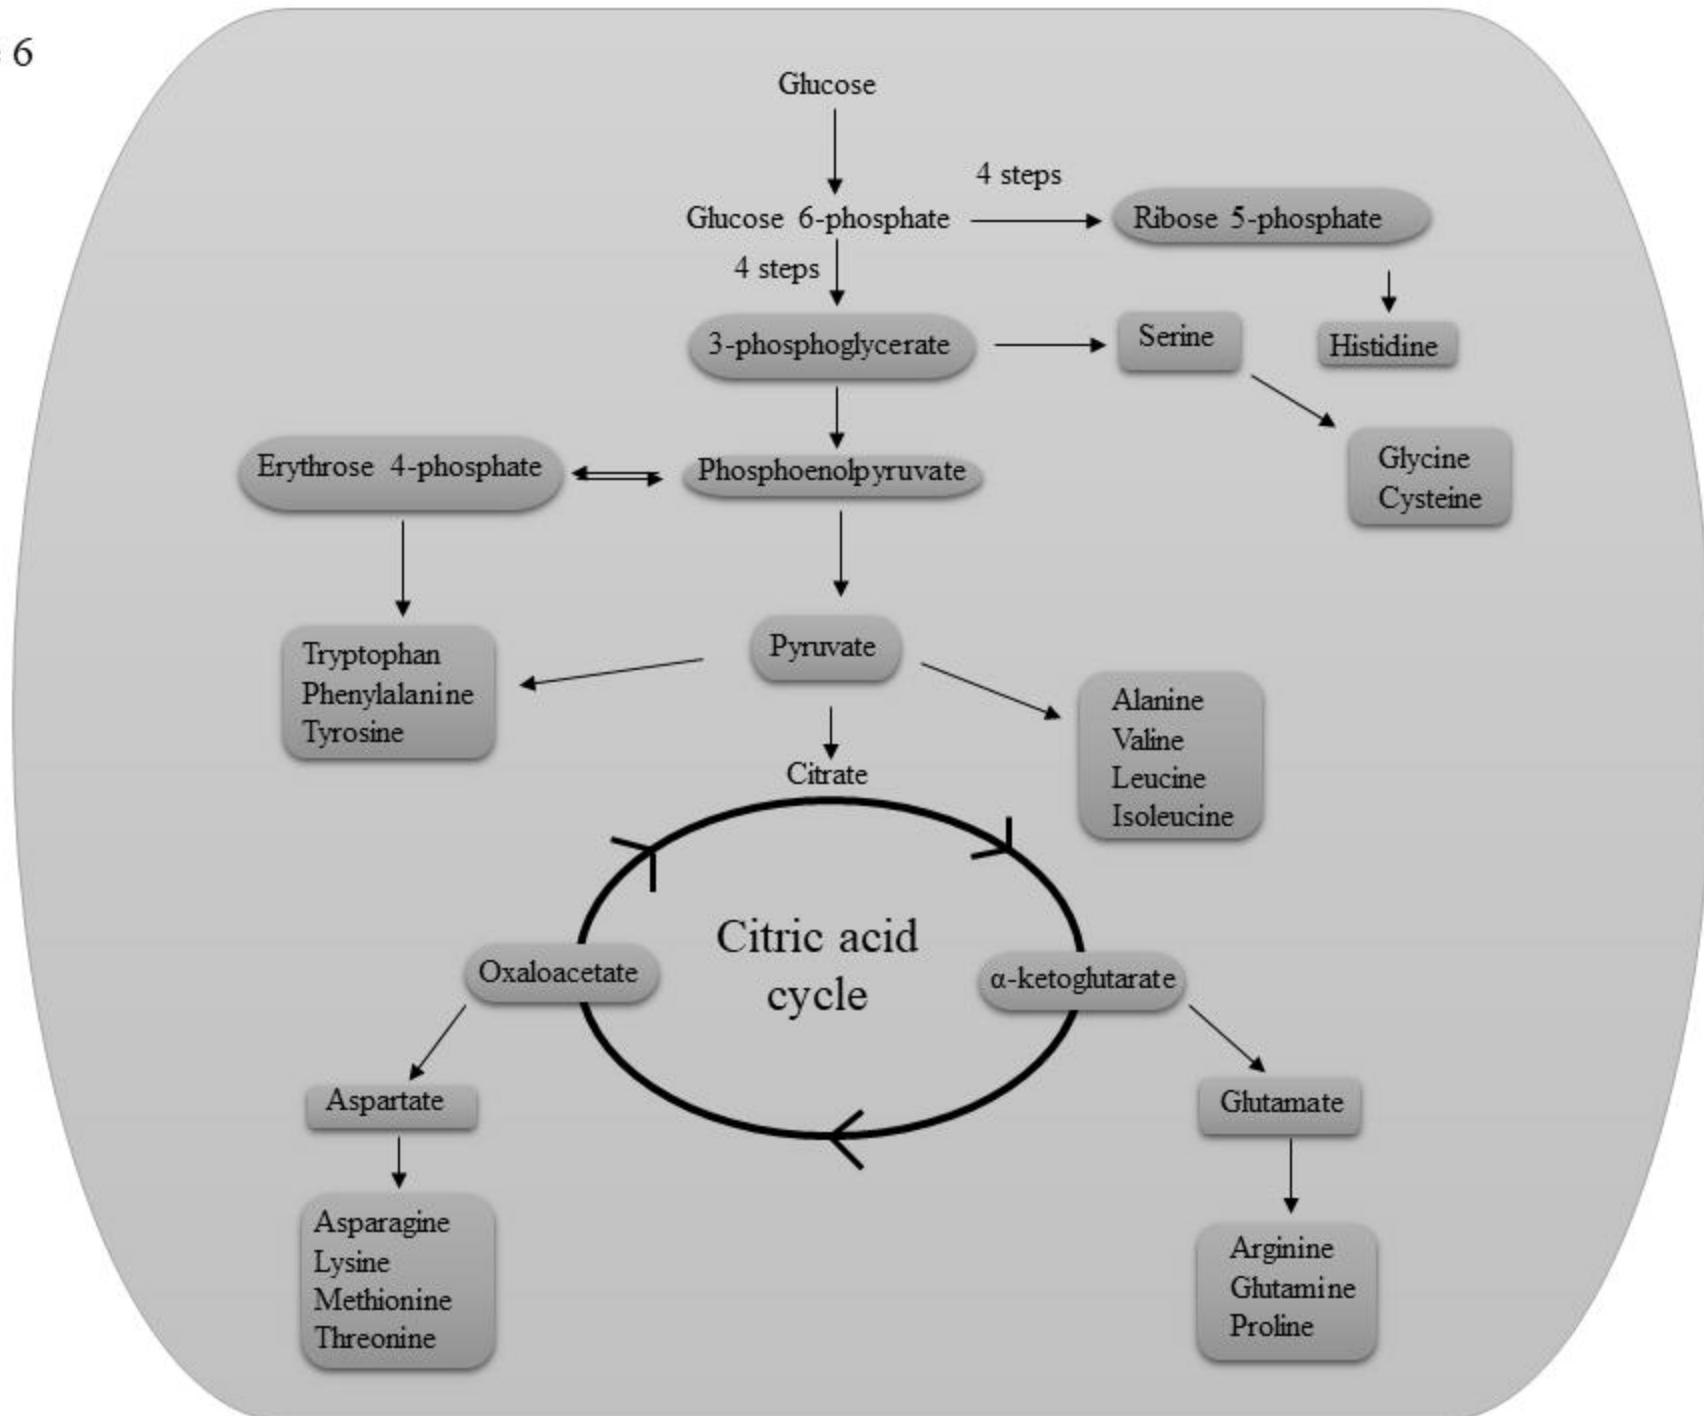

Source: https://www.biorxiv.org/content/10.1101/546077v1.full.pdf
